# Supplementary material
Source: publisher figshare collection journal article supplement (https://gsapubs.figshare.com/ndownloader/files/26669573)
Supplement: Supplementary file 1 [file 26669573]

## Sheet: data
Supplementary Data 1a. Micro-SRS-XRF raw data of concentrations (μg/cm2) of elements of interest. † denotes outlier.
Experiment	sample	Cu	Zn	Fe	Ca	P	Ni	Ti	Mn
Matured_Cu_liver	Cu_liver_1	6.59625	0.939751	8.21146	1.22609	1.44708	0.563506	0.796362	0.211716
Matured_Cu_liver	Cu_liver_1	27.5586	3.74173	37.1057	2.74744	8.84354	1.72188	2.43341	0.646931
Matured_Cu_liver	Cu_liver_1	42.0036	4.49381	36.9427	3.22467	24.8846	1.56755	3.33735	0.642489
Matured_Cu_liver	Cu_liver_1	57.0767	6.82337	49.9942	5.94996	21.9449	2.39276	1.84028	0.749158
Matured_Cu_liver	Cu_liver_1	48.6171	6.00732	33.8888	2.24908	13.2723	1.72278	1.50719	1.13272
Matured_Cu_liver	Cu_liver_1	31.8221	3.84446	17.7796	14.3288	13.121	0.624486	1.26077	0.586567
Matured_Cu_liver	Cu_liver_1	29.3959	3.88389	21.747	9.09876	17.4141	1.10195	1.9395	0.477711
Matured_Cu_liver	Cu_liver_1	41.0812	5.20306	29.9502	2.97039	13.1466	1.53583	1.49292	0.80143
Matured_Cu_liver	Cu_liver_1	46.913	5.77063	37.8352	2.74672	20.6296	1.60667	3.35955	0.862352
Matured_Cu_liver	Cu_liver_1	46.5037	5.22886	41.1877	3.00171	8.85682	1.69573	3.71362	1.18782
Matured_Cu_liver	Cu_liver_1	71.4855	8.98241	48.4119	3.01353	16.3015	2.45262	1.63111	1.46353
Matured_Cu_liver	Cu_liver_1	86.0501	10.4074	48.7702	3.24521	14.7313	2.89693	2.54791	1.7781
Matured_Cu_liver	Cu_liver_1	88.5328	9.69864	47.3796	3.78465	23.8229	2.58013	1.98996	1.52488
Matured_Cu_liver	Cu_liver_1	65.7601	8.25418	36.5218	3.51615	11.8569	2.51059	2.09736	1.13842
Matured_Cu_liver	Cu_liver_1	29.7941	3.52501	26.4804	0.987113	16.0192	1.04912	1.37388	0.745723
Matured_Cu_liver	Cu_liver_1	62.9318	6.25447	37.9095	2.25448	17.7389	1.98596	5.22971	0.973238
Matured_Cu_liver	Cu_liver_1	84.4564	9.52476	48.5097	4.29014	19.36	2.58066	5.03445	1.25283
Matured_Cu_liver	Cu_liver_1	86.7962	9.4143	50.1654	3.04952	17.9958	2.6279	1.76849	1.97467
Matured_Cu_liver	Cu_liver_1	72.2511	8.36616	45.2037	2.51891	14.8646	2.05489	2.57096	1.30487
Matured_Cu_liver	Cu_liver_1	57.0314	6.14064	32.8844	2.23424	14.6496	1.59732	1.61241	1.07166
Matured_Cu_liver	Cu_liver_1	30.6028	3.88572	19.7259	2.74671	14.7353	0.573808	1.39015	0.916243
Matured_Cu_liver	Cu_liver_1	41.0401	4.89824	28.5211	2.46659	16.0114	1.13364	2.05982	0.905081
Matured_Cu_liver	Cu_liver_1	63.6449	8.1847	40.9732	23.3255	19.2412	1.87318	76.3332	1.84064
Matured_Cu_liver	Cu_liver_1	70.0216	7.62517	42.7262	15.5974	17.8148	2.11009	66.06	1.73761
Matured_Cu_liver	Cu_liver_1	90.0029	10.3806	50.8371	3.05598	18.0339	2.69199	4.13522	2.03382
Matured_Cu_liver	Cu_liver_1	85.5569	8.86174	49.3188	1.7571	13.3315	2.3073	1.74683	1.40868
Matured_Cu_liver	Cu_liver_1	53.0165	5.09193	28.3918	3.48779	11.7612	1.9751	1.96486	1.02169
Matured_Cu_liver	Cu_liver_1	25.5898	2.65166	16.216	1.2276	4.34658	0.705251	1.59469	0.476948
Matured_Cu_liver	Cu_liver_1	26.5486	2.43877	16.0829	2.44188	12.969	0.701426	2.83221	0.632482
Matured_Cu_liver	Cu_liver_1	74.5608	10.892	45.4903	86.9464	14.9588	2.65043	385.855	4.32242
Matured_Cu_liver	Cu_liver_1	34.4305	5.9988	21.7577	69.9606	31.0748	0.893158	358.544	3.19333
Matured_Cu_liver	Cu_liver_1	62.8379	6.75737	35.2858	3.23264	14.6742	1.45714	6.57582	1.18081
Matured_Cu_liver	Cu_liver_1	78.9196	8.61825	42.8996	4.2478	11.7963	1.75131	2.20257	1.34833
Matured_Cu_liver	Cu_liver_1	21.1052	2.62944	12.5669	3.19942	5.80934	0.678665	0.685077	0.424971
Matured_Cu_liver	Cu_liver_1	4.50968	0.675324	5.02067	1.2115	2.85972	0.278401	2.24825	0.366095
Matured_Cu_liver	Cu_liver_2	39.7023	5.77533	117.759	29.7388	26.5453	1.46441	2.66664	2.53522
Matured_Cu_liver	Cu_liver_2	44.5412	6.58357	129.635	23.9362	22.303	1.99755	2.80546	2.93675
Matured_Cu_liver	Cu_liver_2	41.7766	6.78254	121.455	36.346	25.1465	1.46884	2.32584	1.89365
Matured_Cu_liver	Cu_liver_2	52.4754	6.9969	170.305	41.4379	25.5034	2.21994	3.89211	3.12771
Matured_Cu_liver	Cu_liver_2	44.0402	5.89328	206.781	28.1369	31.1327	2.42468	3.6131	4.12111
Matured_Cu_liver	Cu_liver_2	47.0079	6.92471	160.615	34.1095	25.3473	1.94506	2.93051	2.94495
Matured_Cu_liver	Cu_liver_2	43.5447	5.6981	146.453	9.81324	22.273	2.25507	3.73559	2.33539
Matured_Cu_liver	Cu_liver_2	44.8157	7.06154	151.334	37.0896	19.3561	1.85537	3.62875	3.53989
Matured_Cu_liver	Cu_liver_2	43.0905	5.82287	121.572	22.9286	22.3032	1.70807	3.50686	1.90347
Matured_Cu_liver	Cu_liver_2	47.2446	6.81963	133.543	31	16.3602	2.11396	2.9232	2.0672
Matured_Cu_liver	Cu_liver_2	54.8516	8.16627	246.088	28.0763	48.6411	2.75241	5.49708	4.28101
Matured_Cu_liver	Cu_liver_2	49.6523	7.50874	182.504	29.1839	28.2085	1.99458	4.5521	3.25821
Matured_Cu_liver	Cu_liver_2	51.0011	7.7774	250.651	21.5539	34.8268	2.74187	4.8808	4.37538
Matured_Cu_liver	Cu_liver_2	49.3499	6.71856	201.053	14.7819	33.0876	2.1084	4.25663	2.42046
Matured_Cu_liver	Cu_liver_2	46.8584	6.48859	217.452	45.4604	43.4628	1.86757	5.77347	4.22098
Matured_Cu_liver	Cu_liver_2	47.0157	6.92503	119.601	26.9463	17.6684	2.09274	4.63017	2.04645
Matured_Cu_liver	Cu_liver_2	46.4324	8.1778	259.415	49.7833	41.0989	2.2821	5.02616	5.84598
Matured_Cu_liver	Cu_liver_2	46.3152	6.83344	215.85	31.9576	37.4183	2.03995	4.58912	3.77742
Matured_Cu_liver	Cu_liver_2	48.2594	7.89064	258.736	22.4784	27.1328	2.64145	4.97729	5.01726
Matured_Cu_liver	Cu_liver_2	41.6467	6.6174	198.889	37.649	24.0188	2.25061	4.13067	3.84354
Matured_Cu_liver	Cu_liver_2	41.6887	5.93936	197.956	19.1474	37.1686	2.11318	4.55849	4.24163
Matured_Cu_liver	Cu_liver_2	43.6068	5.95483	155.104	44.2042	44.7185	1.94454	3.04691	2.34443
Matured_Cu_liver	Cu_liver_2	46.5033	6.36578	155.091	28.5551	42.1273	2.46072	2.83882	2.86161
Matured_Cu_liver	Cu_liver_2	44.6301	6.09563	206.885	22.5679	22.4456	2.21427	4.11746	3.88598
Matured_Cu_liver	Cu_liver_2	47.3188	6.7166	150.706	27.2474	24.2705	1.65396	2.9814	2.38578
Matured_Cu_liver	Cu_liver_2	47.0243	6.67139	162.573	32.2822	27.0005	1.95682	4.4813	3.34682
Matured_Cu_liver	Cu_liver_2	34.5864	5.12439	174.842	26.9799	17.8557	1.7383	2.80756	2.34027
Matured_Cu_liver	Cu_liver_2	31.9519	4.60168	110.15	37.8695	28.1194	1.32552	1.74528	2.00288
Matured_Cu_liver	Cu_liver_2	42.4564	6.21924	158.386	41.681	35.7771	1.91564	3.5159	2.67173
Matured_Cu_liver	Cu_liver_2	41.4026	5.76866	141.602	19.2613	31.4073	1.92191	3.52739	2.18813
Matured_Cu_liver	Cu_liver_2	41.5461	6.61103	119.878	28.5902	26.8752	1.22097	3.1693	2.12983
Matured_Cu_liver	Cu_liver_2	41.031	5.50885	136.382	22.3231	23.9514	2.27344	3.53064	2.68293
Matured_Cu_liver	Cu_liver_2	52.3013	7.84564	206.868	28.5531	31.5932	2.607	4.49448	4.12703
Matured_Cu_liver	Cu_liver_2	47.9698	8.35545	200.563	46.1797	27.101	2.90219	3.90614	5.28672
Matured_Cu_liver	Cu_liver_2	34.5168	4.55772	119.458	32.747	30.9785	1.37867	3.24728	2.1043
Matured_Cu_liver	Cu_liver_2	43.5537	7.11557	155.867	68.931	21.092	1.73069	2.13199	2.86547
Matured_Cu_liver	Cu_liver_2	41.1373	6.06265	192.273	29.7952	37.57	2.60416	3.5444	3.1881
Matured_Cu_liver	Cu_liver_2	39.2771	5.31844	157.83	22.6441	27.0257	1.90018	3.77725	3.13027
Matured_Cu_liver	Cu_liver_2	44.834	6.90566	146.121	35.0688	34.4913	2.16068	3.30111	2.96195
Matured_Cu_liver	Cu_liver_2	56.2032	7.8811	196.273	30.8473	43.9919	2.42196	5.84376	3.71751
Matured_Cu_liver	Cu_liver_2	57.5238	9.42002	309.562	39.3765	21.6877	3.19719	5.60228	5.32618
Matured_Cu_liver	Cu_liver_2	54.3244	8.38525	349.004	21.8174	33.7199	3.40209	5.90446	6.95164
Matured_Cu_liver	Cu_liver_2	35.8222	5.50382	83.738	37.1122	20.7168	1.38297	2.67574	1.35312
Matured_Cu_liver	Cu_liver_2	37.6226	5.93436	115.218	16.614	22.2824	1.7354	2.91965	1.95603
Matured_Cu_liver	Cu_liver_2	35.7676	4.57414	110.754	11.6144	4.46991	1.88568	3.74842	2.4524
Matured_Cu_liver	Cu_liver_2	44.0636	6.2652	139.126	23.0488	22.4201	2.09535	3.05521	2.7335
Matured_Cu_liver	Cu_liver_2	54.3594	8.57315	286.432	29.7883	51.9716	2.52979	5.40781	4.64053
Matured_Cu_liver	Cu_liver_2	50.2811	7.42528	202.712	21.8265	31.8218	2.56686	4.527	3.82434
Matured_Cu_liver	Cu_liver_2	55.446	7.9156	181.297	15.5143	21.0121	2.86381	4.01182	3.56826
Matured_Cu_liver	Cu_liver_2	29.2187	4.34559	136.513	13.207	27.4222	1.09595	2.60975	2.21718
Matured_Cu_liver	Cu_liver_2	37.052	4.04719	121.616	13.132	8.94165	2.37935	2.46041	2.23487
Matured_Cu_liver	Cu_liver_2	42.9853	6.12822	113.791	30.0461	28.3096	2.11778	2.92847	1.68945
Matured_Cu_liver	Cu_liver_2	43.1784	6.60521	164.295	25.2788	25.3598	1.88794	4.92569	3.76485
Matured_Cu_liver	Cu_liver_2	50.5368	8.89085	343.572	26.8991	41.2104	3.35814	6.95973	7.09005
Matured_Cu_liver	Cu_liver_2	46.7475	6.24351	134.115	20.445	23.832	2.1751	2.45913	2.50612
Matured_Cu_liver	Cu_liver_2	49.6347	6.76148	147.089	16.5634	22.2145	2.27798	4.1915	3.52096
Matured_Cu_liver	Cu_liver_3	5.9846	0.886588	8.65678	2.95525	7.26645	0.877185	0.685527	0.531563
Matured_Cu_liver	Cu_liver_3	23.2622	3.05634	22.0026	3.97254	23.4427	2.9954	1.0367	0.696681
Matured_Cu_liver	Cu_liver_3	24.3374	3.80508	39.1266	5.46091	20.5074	5.19076	1.61225	1.01798
Matured_Cu_liver	Cu_liver_3	21.1965	4.54381	81.7009	28.6596	27.9426	2.63438	2.19678	1.72133
Matured_Cu_liver	Cu_liver_3	22.0853	3.34338	35.0345	11.913	43.9381	1.96765	1.0363	0.803552
Matured_Cu_liver	Cu_liver_3	24.4793	3.47596	27.2301	7.42101	21.8964	2.01798	0.688579	1.22804
Matured_Cu_liver	Cu_liver_3	25.296	3.29456	28.3422	7.64739	61.1422	2.06915	1.25894	0.532468
Matured_Cu_liver	Cu_liver_3	11.9444	1.34919	11.7988	3.21346	16.0458	1.22128	0.458722	0.320127
Matured_Cu_liver	Cu_liver_3	0.48332	0.228333	1.13674	1.22885	1.45034	0.112955	0.228045	0.159145
Matured_Cu_liver	Cu_liver_3	14.06	4.24254	94.5317	42.9503	24.7631	2.63765	2.51942	1.86478
Matured_Cu_liver	Cu_liver_3	15.7006	3.70457	53.2072	18.7938	20.43	2.44352	1.14726	1.49452
Matured_Cu_liver	Cu_liver_3	17.4933	2.26694	18.6973	3.21224	11.6653	1.87381	1.26101	0.533344
Matured_Cu_liver	Cu_liver_3	19.3421	2.74621	16.2239	4.18758	33.4335	2.06611	0.457125	0.691194
Matured_Cu_liver	Cu_liver_3	27.7033	3.27804	19.4812	2.94544	52.1449	2.79204	0.797128	0.423839
Matured_Cu_liver	Cu_liver_3	35.2121	4.75405	30.0666	6.41182	66.9431	2.23848	0.800879	0.904897
Matured_Cu_liver	Cu_liver_3	30.5845	4.31494	59.9424	15.3578	67.2409	2.81766	1.49396	1.65745
Matured_Cu_liver	Cu_liver_3	25.0031	2.60513	18.0445	2.68217	44.6062	1.98916	0.904992	0.210521
Matured_Cu_liver	Cu_liver_3	4.16827	0.595621	3.70516	0.976929	8.64757	0.477056	0.453236	0.316298
Matured_Cu_liver	Cu_liver_3	19.5997	3.27264	54.5817	22.9435	35.3202	1.94849	2.0826	1.23806
Matured_Cu_liver	Cu_liver_3	18.3276	5.21086	123.408	54.8975	48.816	3.05303	2.55854	2.65123
Matured_Cu_liver	Cu_liver_3	16.8429	2.58132	21.6124	6.91528	23.3191	2.44043	1.03123	0.906239
Matured_Cu_liver	Cu_liver_3	19.19	2.19428	20.1923	3.23202	26.4085	2.5138	0.922745	0.965929
Matured_Cu_liver	Cu_liver_3	26.1877	5.17159	85.7399	28.1787	47.5109	3.75806	2.10105	2.28084
Matured_Cu_liver	Cu_liver_3	31.5757	5.41095	55.9395	19.5792	58.5017	3.24631	1.95469	1.28387
Matured_Cu_liver	Cu_liver_3	46.5311	6.44557	55.5238	13.0594	51.8716	5.07868	1.63121	1.78886
Matured_Cu_liver	Cu_liver_3	27.9994	2.89897	15.8409	2.24667	36.8278	2.09381	0.810691	0.592695
Matured_Cu_liver	Cu_liver_3	11.0729	1.44768	9.99392	1.71101	14.4242	1.76934	0.340201	0.316553
Matured_Cu_liver	Cu_liver_3	12.4095	2.52541	29.9913	12.1087	16.0411	2.01594	1.14647	0.533388
Matured_Cu_liver	Cu_liver_3	16.0575	2.70399	41.8399	17.5868	35.0817	2.02072	1.03427	1.06931
Matured_Cu_liver	Cu_liver_3	14.112	2.3561	51.5994	19.3106	23.0796	1.60089	1.36085	1.2135
Matured_Cu_liver	Cu_liver_3	24.3595	3.29913	21.0691	5.18768	26.2402	2.21394	1.14608	0.586528
Matured_Cu_liver	Cu_liver_3	18.0702	2.34905	22.0885	2.71347	33.4811	2.32414	0.572219	0.692177
Matured_Cu_liver	Cu_liver_3	20.2744	4.31914	70.5853	28.8176	50.8722	2.20742	1.1427	1.54175
Matured_Cu_liver	Cu_liver_3	26.3132	3.41075	26.3464	4.4425	21.8467	3.091	1.71754	0.639261
Matured_Cu_liver	Cu_liver_3	23.2884	2.92459	18.2255	2.22208	21.8549	2.12763	1.03091	0.373042
Matured_Cu_liver	Cu_liver_3	26.4726	3.46481	25.115	4.97256	17.6064	2.62818	1.26883	0.536652
Matured_Cu_liver	Cu_liver_3	14.1372	2.84573	45.4278	16.253	19.1824	1.95365	1.62408	1.18737
Matured_Cu_liver	Cu_liver_3	16.0577	3.90974	94.7305	42.9627	26.6875	2.42489	1.5153	2.33188
Matured_Cu_liver	Cu_liver_3	19.27	3.44384	45.0436	16.4472	29.4116	2.14747	1.38736	0.914407
Matured_Cu_liver	Cu_liver_3	34.1332	5.33372	52.3682	14.7271	45.6632	3.15482	1.62126	1.02367
Matured_Cu_liver	Cu_liver_3	37.5903	5.51447	54.9535	15.9125	40.244	4.5273	1.99208	1.69006
Matured_Cu_liver	Cu_liver_3	29.3536	3.95092	27.3821	3.72496	32.2398	2.53944	1.49773	0.643211
Matured_Cu_liver	Cu_liver_3	33.0481	6.51859	104.783	40.7079	59.6833	3.74766	2.34609	2.18301
Matured_Cu_liver	Cu_liver_3	39.7146	4.55783	48.9775	11.9992	28.0288	3.93503	1.04379	0.809364
Matured_Cu_liver	Cu_liver_3	27.3661	3.2714	23.0605	3.98867	23.5379	3.0362	0.809593	0.968551
Matured_Cu_liver	Cu_liver_3	7.32145	1.23354	8.45473	4.94047	8.74639	1.16369	0.458415	0.266594
Matured_Cu_liver	Cu_liver_3	17.234	3.88978	89.2798	34.4872	43.9243	3.05031	2.30215	1.82081
Matured_Cu_liver	Cu_liver_3	34.8334	6.35172	47.4353	8.90951	2.92093	5.43128	1.37782	1.28205
Matured_Cu_liver	Cu_liver_3	32.7656	4.35844	55.4555	11.9302	38.1347	4.82626	1.61434	1.0193
Matured_Cu_liver	Cu_liver_3	26.6277	6.50555	90.5923	32.7612	32.4677	4.59754	2.66856	2.15919
Matured_Cu_liver	Cu_liver_3	22.8938	3.37886	29.0127	5.67111	34.9214	2.77641	1.14393	0.904755
Matured_Cu_liver	Cu_liver_3	22.0286	2.71304	20.4152	2.73384	23.466	2.02748	1.26833	0.536441
Matured_Cu_liver	Cu_liver_3	33.1488	6.43638	69.735	26.834	54.7574	3.4578	2.21063	1.67805
Matured_Cu_liver	Cu_liver_3	32.0145	4.84149	58.5906	15.5709	35.5692	4.03988	2.67986	1.02996
Matured_Cu_liver	Cu_liver_3	11.0682	1.59885	12.1898	2.70436	5.80326	1.55365	0.91248	0.477592
Matured_Cu_liver	Cu_liver_3	12.7015	1.66181	18.3037	5.42785	13.1035	1.98436	1.25909	0.745547
Matured_Cu_liver	Cu_liver_3	29.2361	4.65319	39.2156	8.40944	30.6512	4.63226	1.14749	1.06773
Matured_Cu_liver	Cu_liver_3	28.1442	5.90795	78.1702	17.2919	35.4931	4.40557	2.4416	1.67686
Matured_Cu_liver	Cu_liver_3	21.4122	5.50229	68.6569	24.0621	36.5968	3.16375	1.49612	1.39212
Matured_Cu_liver	Cu_liver_3	18.8716	2.67463	20.9382	3.21941	23.3826	2.04872	0.804251	0.374173
Matured_Cu_liver	Cu_liver_3	7.27095	0.832101	7.67944	1.97661	10.2063	0.880053	0.343884	0.26665
Matured_Cu_liver	Cu_liver_3	11.0719	1.23001	10.2534	1.72422	14.5356	1.35848	0.914207	0.42533
Matured_Cu_liver	Cu_liver_3	15.6833	2.31588	14.7122	2.70818	29.0572	1.66899	0.685325	0.478265
Matured_Cu_skin	Cu_skin_1	0.776717	0.656416	1.27307	20.152	11.602	0.0847114	0.114016	0.10609
Matured_Cu_skin	Cu_skin_1	10.023	3.99448	10.1547	209.306	66.2203	0.616642	0.792232	0.895127
Matured_Cu_skin	Cu_skin_1	9.43263	8.02689	18.7491	464.404	153.865	0.650038	2.5106	1.06186
Matured_Cu_skin	Cu_skin_1	5.51386	7.44899	16.6779	462.127	159.3	0.682933	1.14898	1.06911
Matured_Cu_skin	Cu_skin_1	9.2173	7.26157	17.9241	486.146	157.516	1.0791	2.40792	1.387
Matured_Cu_skin	Cu_skin_1	8.60496	4.86679	7.75327	238.381	78.556	0.594815	1.48679	0.478884
Matured_Cu_skin	Cu_skin_1	10.6083	10.9737	23.0343	576.143	177.095	1.36785	3.79713	1.2848
Matured_Cu_skin	Cu_skin_1	3.75346	5.13823	9.51934	232.66	73.3426	0.571207	196.622	1.66322
Matured_Cu_skin	Cu_skin_1	1.54904	0.65456	1.45082	42.3955	14.4615	0.168944	0.454773	0.211581
Matured_Cu_skin	Cu_skin_1	4.747	2.76695	5.48755	150.98	43.0417	0.363152	0.902358	0.472294
Matured_Cu_skin	Cu_skin_1	6.61587	6.08371	11.2845	371.38	107.402	0.791255	1.59746	0.849383
Matured_Cu_skin	Cu_skin_1	8.27177	8.92861	20.702	525.701	166.167	1.12534	2.72633	1.42696
Matured_Cu_skin	Cu_skin_1	11.3394	12.0799	21.7526	629.54	206.553	0.962939	1.94407	1.59612
Matured_Cu_skin	Cu_skin_1	14.4992	15.896	28.8295	850.449	235.411	1.94802	3.7015	1.82973
Matured_Cu_skin	Cu_skin_1	11.1509	14.8192	31.7067	744.873	194.097	1.42074	3.67146	2.0284
Matured_Cu_skin	Cu_skin_1	10.0335	11.3512	28.2846	612.787	176.002	1.41105	195.693	3.5163
Matured_Cu_skin	Cu_skin_1	3.97544	2.21994	3.8581	112.709	42.4856	0.313771	0.460707	0.214341
Matured_Cu_skin	Cu_skin_1	8.30595	6.83804	13.9273	333.169	112.893	0.856395	0.576324	0.697142
Matured_Cu_skin	Cu_skin_1	8.94378	7.8393	16.9719	481.677	157.591	1.3069	2.17962	1.06743
Matured_Cu_skin	Cu_skin_1	10.9462	9.67428	18.7444	537.355	138.77	0.948545	1.5088	1.18793
Matured_Cu_skin	Cu_skin_1	12.3778	14.9641	32.1877	798.704	244.098	1.69945	2.55872	2.21853
Matured_Cu_skin	Cu_skin_1	14.9147	21.3278	41.4965	1068.9	292.304	2.21815	4.00683	2.30278
Matured_Cu_skin	Cu_skin_1	13.3883	19.2791	38.8914	932.279	263.814	2.42401	4.42774	2.54787
Matured_Cu_skin	Cu_skin_1	9.3139	13.2924	28.7323	676.173	172.583	1.47736	31.9317	2.12229
Matured_Cu_skin	Cu_skin_1	3.08804	2.09405	3.29032	114.366	40.8144	0.227051	0.572989	0.26658
Matured_Cu_skin	Cu_skin_1	7.0221	5.86295	13.5068	332.117	99.3087	0.568703	1.37778	0.961509
Matured_Cu_skin	Cu_skin_1	7.93406	6.35805	16.5456	443.442	154.964	1.08164	2.18373	1.17638
Matured_Cu_skin	Cu_skin_1	10.7036	10.6073	23.2413	562.301	162.442	0.862589	3.01856	1.67444
Matured_Cu_skin	Cu_skin_1	15.0544	18.6547	35.7553	863.161	217.729	1.81684	5.24002	2.27537
Matured_Cu_skin	Cu_skin_1	12.4574	18.4361	39.3313	919.305	259.818	2.16805	3.38493	2.28078
Matured_Cu_skin	Cu_skin_1	9.3157	15.9846	36.9013	877.664	211.188	1.7828	2.55433	1.72856
Matured_Cu_skin	Cu_skin_1	9.96185	16.648	39.7594	887.943	208.881	1.88826	5.51302	1.9646
Matured_Cu_skin	Cu_skin_1	5.48813	1.49328	1.78421	51.1872	16.0518	0.369361	0.229447	0.160123
Matured_Cu_skin	Cu_skin_1	3.5907	2.48334	5.18399	168.368	49.316	0.254173	0.342099	0.318319
Matured_Cu_skin	Cu_skin_1	8.34221	8.69668	19.4975	489.245	134.625	0.997204	2.30086	1.01694
Matured_Cu_skin	Cu_skin_1	13.2301	11.7347	27.4648	690.615	200.239	1.6627	2.54656	2.4234
Matured_Cu_skin	Cu_skin_1	17.1706	19.2613	40.9136	987.544	321.765	2.38941	3.29442	2.57277
Matured_Cu_skin	Cu_skin_1	20.1725	25.9264	47.7627	1264.07	326.354	3.51389	5.91181	2.97047
Matured_Cu_skin	Cu_skin_1	9.63614	16.8395	35.4434	856.183	242.152	1.50411	3.15344	2.17351
Matured_Cu_skin	Cu_skin_1	5.37168	10.3864	22.6306	586.45	147.016	0.830118	4.39207	1.23679
Matured_Cu_skin	Cu_skin_1	1.81982	1.57617	2.14576	84.3954	24.7561	0.22683	1.37384	0.319585
Matured_Cu_skin	Cu_skin_1	3.6146	3.26002	6.42357	214.725	72.6569	0.311227	0.913941	0.478357
Matured_Cu_skin	Cu_skin_1	6.73726	7.05244	18.0222	424.107	162.364	0.939846	2.18494	1.23054
Matured_Cu_skin	Cu_skin_1	11.9678	13.2117	28.3544	742.953	225.739	1.45557	4.14867	1.82291
Matured_Cu_skin	Cu_skin_1	13.5173	16.0267	33.7667	873.287	224.509	2.4285	3.80695	1.61015
Matured_Cu_skin	Cu_skin_1	14.8584	21.0289	45.5766	1079.87	292.25	2.94726	6.12694	2.68607
Matured_Cu_skin	Cu_skin_1	15.0175	21.6463	46.8879	1026.19	248.764	2.36343	4.83042	3.06952
Matured_Cu_skin	Cu_skin_1	5.29926	8.79127	21.7245	494.433	144.487	1.20567	3.94095	1.29424
Matured_Cu_skin	Cu_skin_1	2.0718	1.52882	2.79639	86.5454	35.9663	0.0840338	1.01793	0.157862
Matured_Cu_skin	Cu_skin_1	3.4363	3.69322	6.74358	215.032	67.8503	0.224865	0.794461	0.158408
Matured_Cu_skin	Cu_skin_1	3.89371	4.83581	9.25382	289.516	81.4259	0.396351	1.48607	0.797752
Matured_Cu_skin	Cu_skin_1	6.1148	6.4131	15.5551	441.038	135.05	0.886025	0.923247	1.12753
Matured_Cu_skin	Cu_skin_1	12.1634	14.345	32.502	788.809	254.761	1.69167	3.58897	2.20838
Matured_Cu_skin	Cu_skin_1	12.5265	13.9248	35.5493	830.059	192.44	1.6717	3.14222	2.27407
Matured_Cu_skin	Cu_skin_1	15.1199	20.1636	46.2343	1009.9	250.231	2.62345	3.72499	2.05798
Matured_Cu_skin	Cu_skin_1	3.31048	3.64923	8.85662	222.419	73.8845	0.282072	1.48063	0.794834
Matured_Cu_skin	Cu_skin_2	33.4271	15.0635	16.706	386.14	120.706	2.06359	1.96736	1.5614
Matured_Cu_skin	Cu_skin_2	49.8476	15.5044	16.7101	386.95	69.902	3.03396	2.28981	1.17185
Matured_Cu_skin	Cu_skin_2	32.6736	13.9318	13.1882	319.662	80.615	1.94061	1.72848	1.55472
Matured_Cu_skin	Cu_skin_2	31.4539	9.51341	7.25835	197.15	61.1561	2.29643	1.03028	1.11844
Matured_Cu_skin	Cu_skin_2	71.1061	12.3592	7.54062	192.47	38.6025	4.07604	1.98432	1.24903
Matured_Cu_skin	Cu_skin_2	94.3198	9.88622	6.10418	71.5293	32.6985	4.86175	1.16849	1.03291
Matured_Cu_skin	Cu_skin_2	140.851	14.057	5.51674	116.243	59.65	6.99753	3.16545	1.25453
Matured_Cu_skin	Cu_skin_2	165.967	16.9318	5.46071	106.614	39.0404	9.53094	3.06927	1.42796
Matured_Cu_skin	Cu_skin_2	67.4421	6.06153	2.58742	41.7066	16.2114	3.70164	1.2745	0.323431
Matured_Cu_skin	Cu_skin_2	30.6058	3.97078	2.78158	51.1672	21.4655	1.14238	1.01254	0.523422
Matured_Cu_skin	Cu_skin_2	24.7966	2.88309	1.45741	38.9103	28.1739	0.95998	0.664491	0.309151
Matured_Cu_skin	Cu_skin_2	15.6327	2.91289	1.89225	59.9066	90.5358	0.895379	0.677879	0.525632
Matured_Cu_skin	Cu_skin_2	53.8877	16.7639	15.7983	441.448	110.982	2.54048	1.88652	2.3588
Matured_Cu_skin	Cu_skin_2	81.8407	22.4903	22.0667	567.122	162.201	4.20118	2.80775	2.72144
Matured_Cu_skin	Cu_skin_2	40.317	16.0943	15.552	372.596	102.788	2.55241	3.1621	2.125
Matured_Cu_skin	Cu_skin_2	58.479	15.6374	15.9548	370.171	108.627	3.38984	3.04166	2.55809
Matured_Cu_skin	Cu_skin_2	52.8907	17.2338	14.4721	333.018	59.3718	2.9189	2.21715	1.52013
Matured_Cu_skin	Cu_skin_2	27.9145	8.80823	7.24698	172.902	30.9191	1.40469	0.694512	1.02321
Matured_Cu_skin	Cu_skin_2	67.3765	12.9405	5.66927	200.068	74.7242	3.5209	1.40992	2.02253
Matured_Cu_skin	Cu_skin_2	132.73	15.3476	7.28303	168.456	49.78	7.95953	4.03219	1.15868
Matured_Cu_skin	Cu_skin_2	88.9711	11.099	8.4422	101.404	40.3921	4.95175	1.99941	1.03965
Matured_Cu_skin	Cu_skin_2	62.0329	7.6227	3.25693	96.3206	25.2295	2.62954	1.16676	0.922808
Matured_Cu_skin	Cu_skin_2	42.4777	5.26845	2.31855	65.1674	36.9774	1.69913	1.27912	0.757403
Matured_Cu_skin	Cu_skin_2	63.1762	7.96004	4.0892	119.703	58.6217	2.73935	2.30435	0.911275
Matured_Cu_skin	Cu_skin_2	81.8311	24.8682	24.7728	591.333	133.98	3.70548	3.47118	2.89577
Matured_Cu_skin	Cu_skin_2	62.7991	30.8167	33.6645	713.697	149.138	3.48456	3.63473	3.05478
Matured_Cu_skin	Cu_skin_2	47.8684	28.6582	29.323	592.515	133.616	3.27389	2.59665	3.18493
Matured_Cu_skin	Cu_skin_2	39.2602	17.9679	19.9911	424.735	95.7219	2.37987	1.85242	2.37003
Matured_Cu_skin	Cu_skin_2	35.2157	16.0571	16.2995	278.531	44.1846	2.15074	1.85264	1.93934
Matured_Cu_skin	Cu_skin_2	67.2717	21.6817	17.997	471.439	124.079	4.27872	2.70314	2.89799
Matured_Cu_skin	Cu_skin_2	69.8644	16.1646	10.6639	269.325	57.9291	4.33811	2.21874	1.46689
Matured_Cu_skin	Cu_skin_2	142.069	18.6702	9.27692	218.666	74.7391	7.36513	3.71736	1.56211
Matured_Cu_skin	Cu_skin_2	191.312	27.2351	10.8832	325.883	84.4811	10.8862	4.10579	3.09002
Matured_Cu_skin	Cu_skin_2	91.6409	13.2985	5.69312	133.178	29.7694	4.55006	2.34041	0.871088
Matured_Cu_skin	Cu_skin_2	60.0375	9.09333	4.25803	100.067	32.4783	3.04687	1.50881	0.971954
Matured_Cu_skin	Cu_skin_2	21.7695	3.18367	1.96479	51.6184	18.947	1.22024	0.343748	0.426472
Matured_Cu_skin	Cu_skin_2	87.2799	65.05	63.8748	1286.95	264.254	7.24584	9.2197	7.49218
Matured_Cu_skin	Cu_skin_2	49.6842	36.4439	29.751	539.051	69.7989	3.44092	3.0356	3.9653
Matured_Cu_skin	Cu_skin_2	28.7482	18.2309	11.4964	309.443	56.4156	2.51485	1.86748	1.35756
Matured_Cu_skin	Cu_skin_2	67.6387	35.8385	33.5959	818.184	177.598	4.54219	4.73301	4.51411
Matured_Cu_skin	Cu_skin_2	69.6434	35.9821	35.6474	722.616	126.677	5.31926	4.4396	3.9077
Matured_Cu_skin	Cu_skin_2	52.0435	17.4218	15.9333	393.737	89.4234	2.58266	1.99191	1.41734
Matured_Cu_skin	Cu_skin_2	66.7002	21.6442	17.1701	394.114	67.5215	4.20697	2.47725	3.12829
Matured_Cu_skin	Cu_skin_2	100.532	12.7439	6.45556	157.526	76.0982	5.89763	1.87692	1.30984
Matured_Cu_skin	Cu_skin_2	191.706	29.1021	14.5156	412.239	120.783	12.0902	4.50438	2.88858
Matured_Cu_skin	Cu_skin_2	179.579	24.5326	10.602	291.477	78.3943	9.33783	4.83387	3.03606
Matured_Cu_skin	Cu_skin_2	136.702	20.2343	10.5869	246.858	69.6578	6.25064	3.45248	1.38469
Matured_Cu_skin	Cu_skin_2	44.6205	8.37607	6.32324	159.331	16.3133	2.31003	1.16593	1.13913
Matured_Cu_skin	Cu_skin_2	105.894	62.8583	60.3461	1147.15	170.478	7.42317	8.52896	5.95208
Matured_Cu_skin	Cu_skin_2	52.4452	31.1866	25.7773	502.198	74.6115	3.54464	3.75411	2.5107
Matured_Cu_skin	Cu_skin_2	23.4525	12.3414	9.95307	228.973	82.8871	2.2533	2.82787	2.05928
Matured_Cu_skin	Cu_skin_2	90.9581	39.0141	28.127	616.544	158.058	6.03771	3.78703	4.01932
Matured_Cu_skin	Cu_skin_2	110.647	50.8698	43.7951	912.272	143.435	7.92292	5.02542	5.01825
Matured_Cu_skin	Cu_skin_2	28.1541	11.3929	11.0738	192.98	23.4504	1.19855	1.61317	0.911343
Matured_Cu_skin	Cu_skin_2	50.3184	16.2606	11.4874	229.764	51.921	3.20608	1.74939	1.89909
Matured_Cu_skin	Cu_skin_2	21.3999	3.30562	2.01489	57.1768	10.2246	1.16603	1.0335	0.587682
Matured_Cu_skin	Cu_skin_2	20.1694	2.69552	1.41618	32.3473	10.2001	0.680919	0.687352	0.213191
Matured_Cu_skin	Cu_skin_2	87.0159	14.3468	9.97603	274.927	80.6718	3.86863	1.52684	1.58463
Matured_Cu_skin	Cu_skin_2	101.523	20.2408	15.9326	398.715	89.5041	6.05511	2.62382	2.164
Matured_Cu_skin	Cu_skin_2	71.8761	11.914	9.25631	189.01	46.2258	3.04852	2.46186	1.52715
Matured_Cu_skin	Cu_skin_2	105.807	48.3218	49.6981	980.189	155.293	6.22689	5.07693	6.07375
Matured_Cu_skin	Cu_skin_2	54.122	25.3433	24.1874	530.24	111.275	3.14876	3.14935	2.22496
Matured_Cu_skin	Cu_skin_2	41.4587	22.2925	25.0798	516.445	114.921	2.44098	1.9947	2.89325
Matured_Cu_skin	Cu_skin_2	217.486	56.2095	39.6616	997.67	207.959	9.14108	5.82134	7.14542
Matured_Cu_skin	Cu_skin_2	197.99	57.3867	38.3194	802.301	127.747	10.3177	8.05937	6.5185
Matured_Cu_skin	Cu_skin_2	37.3057	14.1637	10.4072	229.989	58.7535	1.85894	2.54049	1.7192
Matured_Cu_skin	Cu_skin_2	83.5563	10.3663	5.68988	146.023	42.7903	4.45304	2.08805	0.917485
Matured_Cu_skin	Cu_skin_2	30.271	2.8799	1.00935	29.0146	8.78054	1.36769	0.690307	0.588796
Matured_Cu_skin	Cu_skin_2	15.4975	3.27862	1.46615	51.7588	27.7672	0.71137	0.229789	0.374178
Matured_Cu_skin	Cu_skin_2	45.4193	9.94016	7.77972	224.934	80.7588	3.05906	1.96244	1.12784
Matured_Cu_skin	Cu_skin_2	74.0229	15.0859	9.57576	305.478	77.8567	3.20673	1.88336	2.02627
Matured_Cu_skin	Cu_skin_2	43.6449	10.4253	5.99753	200.491	47.09	2.12025	1.15691	1.13032
Matured_Cu_skin	Cu_skin_3	0.37839	0.966933	6.02576	5.14268	8.67084	0.872265	0.227227	0.528582
Matured_Cu_skin	Cu_skin_3	2.49387	11.2963	21.5121	41.2594	35.4152	7.95859	1.74017	1.78113
Matured_Cu_skin	Cu_skin_3	0.805804	3.85542	2.57424	16.5994	15.8459	1.31826	0.906015	0.368829
Matured_Cu_skin	Cu_skin_3	3.19701	17.8154	23.4033	56.3334	25.2294	8.2931	2.56686	1.62848
Matured_Cu_skin	Cu_skin_3	5.68741	11.9157	36.0582	40.2376	51.9422	12.4828	2.33347	1.84558
Matured_Cu_skin	Cu_skin_3	5.4512	11.506	48.1108	38.9322	47.1275	15.7425	1.96832	2.1547
Matured_Cu_skin	Cu_skin_3	3.39832	2.28186	10.7694	10.0701	36.2353	1.86257	1.02555	0.954259
Matured_Cu_skin	Cu_skin_3	0.902249	1.9222	65.45	9.88181	8.74717	7.9195	2.06305	4.63914
Matured_Cu_skin	Cu_skin_3	8.63757	8.13647	19.9949	16.8946	203.795	6.19464	1.95952	2.03782
Matured_Cu_skin	Cu_skin_3	9.63406	15.0914	20.3114	29.376	154.255	9.35353	2.19445	1.93444
Matured_Cu_skin	Cu_skin_3	1.36721	0.972945	33.3705	4.68182	14.5412	2.265	1.48616	0.797802
Matured_Cu_skin	Cu_skin_3	0.885158	1.29141	43.3414	6.9193	21.8743	2.52703	0.687886	1.12012
Matured_Cu_skin	Cu_skin_3	0.512979	0.73511	6.71132	5.11271	10.057	0.783261	1.58132	0.315301
Matured_Cu_skin	Cu_skin_3	0.239165	1.04513	8.775	5.35113	5.74146	0.726629	0.451381	0.420005
Matured_Cu_skin	Cu_skin_3	1.60724	1.62882	4.87107	10.5808	23.2333	2.94036	0.456637	0.371784
Matured_Cu_skin	Cu_skin_3	9.50654	6.21313	4.19644	29.0928	21.824	2.46456	0.91507	0.745029
Matured_Cu_skin	Cu_skin_3	3.3927	4.10056	5.85211	21.8234	79.5857	10.4244	1.13761	1.11146
Matured_Cu_skin	Cu_skin_3	0.905843	3.28364	5.00172	27.2832	14.6367	3.96127	1.49592	0.642431
Matured_Cu_skin	Cu_skin_3	2.73725	1.14582	7.02783	5.18	21.8344	2.06895	0.801068	0.745385
Matured_Cu_skin	Cu_skin_3	4.63878	2.24423	26.1132	10.7633	47.6373	3.45713	1.81583	1.74241
Matured_Cu_skin	Cu_skin_3	1.52972	2.52938	46.085	11.2657	17.7283	6.41458	0.813028	0.97266
Matured_Cu_skin	Cu_skin_3	0.617013	0.821846	13.454	4.14853	7.20037	1.73842	1.35859	0.36871
Matured_Cu_skin	Cu_skin_3	4.77294	10.1841	49.7362	43.473	38.3339	16.8797	3.94103	2.5346
Matured_Cu_skin	Cu_skin_3	2.91591	5.45657	54.0429	29.3354	45.4791	10.3975	3.57547	2.89765
Matured_Cu_skin	Cu_skin_3	1.43078	2.01957	16.3167	10.1858	20.5249	4.8241	2.07466	0.750728
Matured_Cu_skin	Cu_skin_3	1.04382	1.58211	65.3027	7.9264	32.158	4.35446	1.83868	2.56631
Matured_Cu_skin	Cu_skin_3	0.716974	1.32664	10.0277	8.26392	10.0403	1.50806	0.789344	0.367238
Matured_Cu_skin	Cu_skin_3	0.380709	0.88702	7.24789	2.7103	5.81599	1.10409	0.342931	0.319093
Matured_Cu_skin	Cu_skin_3	0.48406	1.22917	1.36617	8.61514	5.81024	0.593924	0.342591	0.159389
Matured_Cu_skin	Cu_skin_3	1.64811	4.44626	19.0107	22.725	13.1189	5.87493	1.03138	1.11964
Matured_Cu_skin	Cu_skin_3	2.61871	3.78876	26.0041	16.1898	36.1891	8.85002	1.47945	1.16483
Matured_Cu_skin	Cu_skin_3	1.43848	0.888356	9.03927	4.19495	23.299	1.67281	0.801377	0.532623
Matured_Cu_skin	Cu_skin_3	4.33606	1.04852	9.48065	6.34456	17.2802	2.13088	1.58496	0.632051
Matured_Cu_skin	Cu_skin_3	4.19226	2.57722	299.344	18.8763	42.1486	32.4159	6.50892	23.0697
Matured_Cu_skin	Cu_skin_3	2.17867	1.46978	33.0566	7.44485	41.0046	4.47663	1.03619	2.14258
Matured_Cu_skin	Cu_skin_3	0.999216	1.4243	5.53649	4.66056	7.2376	1.04281	0.910407	0.529452
Matured_Cu_skin	Cu_skin_3	10.034	44.7136	21.5574	125.894	92.6787	13.4173	2.70295	2.40571
Matured_Cu_skin	Cu_skin_3	4.07527	10.1364	52.9866	40.6666	48.2889	10.1429	2.18579	2.67612
Matured_Cu_skin	Cu_skin_3	0.749564	2.47879	7.02547	12.9062	13.1818	1.9677	1.15148	0.535718
Matured_Cu_skin	Cu_skin_3	0.560057	1.01286	9.45103	8.22336	20.5875	1.97561	1.04049	0.484083
Matured_Cu_skin	Cu_skin_3	0.44481	1.10323	5.18254	5.84609	7.18727	0.671711	0.226019	0.262885
Matured_Cu_skin	Cu_skin_3	4.70431	21.8734	24.7839	74.7866	26.7473	9.83701	2.80375	2.2284
Matured_Cu_skin	Cu_skin_3	1.29349	4.67676	6.95081	22.5913	11.5927	1.97501	1.02531	0.742034
Matured_Cu_skin	Cu_skin_3	1.74002	5.55281	16.1798	24.7747	38.0121	3.47284	1.60915	1.12297
Matured_Cu_skin	Cu_skin_3	0.834632	1.03504	15.6647	4.9515	30.6807	1.93434	1.60804	0.320627
Matured_Cu_skin	Cu_skin_3	7.09413	2.41501	17.4047	8.9124	118.336	4.83569	0.803991	0.80154
Matured_Cu_skin	Cu_skin_3	2.51104	3.32157	33.4374	18.4927	33.4662	9.51907	2.28786	1.11763
Matured_Cu_skin	Cu_skin_3	3.7283	3.60087	32.0328	16.8678	70.2637	8.72144	1.72624	5.99667
Matured_Cu_skin	Cu_skin_3	4.02916	4.03768	34.0459	21.1094	74.7423	10.1298	1.84347	2.19777
Matured_Cu_skin	Cu_skin_3	1.00303	1.97303	14.4407	7.14061	31.9669	2.17844	1.25658	1.11609
Matured_Cu_skin	Cu_skin_3	3.42414	5.37437	11.1259	16.3336	27.748	3.09943	1.4926	0.854674
Matured_Cu_skin	Cu_skin_3	7.54138	32.1445	16.164	124.596	59.7776	9.2239	2.81975	1.47586
Matured_Cu_skin	Cu_skin_3	0.784736	5.0172	4.04238	24.581	14.6522	1.74025	0.921542	0.321557
Matured_Cu_skin	Cu_skin_3	5.07518	20.1344	8.03061	70.7557	59.226	6.6595	1.39687	1.24561
Matured_Cu_skin	Cu_skin_3	0.931726	2.42501	5.6813	9.08969	21.746	1.29844	1.25372	0.583287
Matured_Cu_skin	Cu_skin_3	0.206335	0.511759	5.34462	2.93783	5.7789	0.787626	0.340743	0.264215
Matured_Cu_skin	Cu_skin_3	1.15729	1.18191	8.11437	8.72345	20.0195	4.92806	1.46147	0.627638
Matured_Cu_skin	Cu_skin_3	3.46908	2.30011	16.8286	6.60206	51.9467	3.70857	1.02098	0.844457
Matured_Cu_skin	Cu_skin_3	3.24508	10.3604	49.6971	41.2886	21.7546	10.3352	2.8505	1.69751
Matured_Cu_skin	Cu_skin_3	2.87579	7.60814	39.9426	32.5086	19.0375	13.3156	1.72695	2.1961
Matured_Cu_skin	Cu_skin_3	0.736708	0.878192	9.65794	6.83028	2.87906	2.77481	0.905381	1.21102
Matured_Cu_skin	Cu_skin_3	0.803241	3.10843	11.4797	14.6	14.3596	2.01303	1.46759	7.09051
Matured_Cu_skin	Cu_skin_3	0.513867	1.67102	8.25703	2.68272	12.9528	1.09286	0.79203	9.15955
Matured_Cu_skin	Cu_skin_3	0.974689	2.60124	10.4952	6.3302	8.62056	3.13314	1.01659	1.26124
Matured_Cu_skin	Cu_skin_3	3.90712	18.1409	14.1056	58.3619	42.501	8.44638	2.30437	1.60814
Matured_Cu_skin	Cu_skin_3	1.81077	7.23102	9.04478	31.6195	14.3533	3.01823	1.46695	0.734991
Matured_Cu_skin	Cu_skin_3	1.11886	3.75697	6.30262	17.1559	17.3555	1.74592	0.909635	0.105801
Matured_Cu_skin	Cu_skin_3	0.880941	5.54089	4.04958	23.6103	23.2215	1.38466	0.684608	0.31851
Matured_Cu_skin	Cu_skin_3	0.254383	0.644949	4.19921	4.34633	4.27475	0.665853	0.448096	0.156356
Matured_Cu_skin	Cu_skin_3	0.136159	0.590987	3.497	3.15032	4.29015	0.4455	0.449709	0.313837
Matured_Cu_skin	Cu_skin_3	0.552	3.3942	9.58772	13.2628	17.3926	3.32998	1.13947	0.47712
Matured_Cu_skin	Cu_skin_3	1.76729	8.73794	12.4143	29.3568	18.9254	3.23135	1.03007	1.11821
Matured_Cu_skin	Cu_skin_3	5.9031	3.68545	18.6689	14.3801	109.732	5.5835	1.15026	0.96327
Matured_Cu_skin	Cu_skin_3	2.15929	7.57612	13.7343	21.496	48.6757	3.38889	0.927704	3.56078
Matured_Cu_skin	Cu_skin_3	0.516553	2.79011	10.6587	8.33539	10.1271	1.35209	0.568693	1.79915
Matured_Cu_skin	Cu_skin_3	3.66314	0.947296	11.5243	7.41558	8.75216	1.33487	1.03211	0.640247
Matured_Cu_skin	Cu_skin_3	0.488957	0.895107	10.994	6.46456	10.2708	1.14273	0.922819	3.64936
Matured_Cu_skin	Cu_skin_3	5.37184	4.25184	11.7378	9.2785	10.3589	109.202	2.44319	10.2842
Matured_Cu_skin	Cu_skin_3	11.3666	18.9437	19.058	55.2308	48.5102	145.78	3.21786	12.4758
Matured_Cu_skin	Cu_skin_3	0.590637	1.3213	7.73343	8.16224	13.1364	1.39254	1.49176	0.373711
Matured_Cu_skin	Cu_skin_3	0.347083	0.832152	6.85707	3.70637	2.91626	1.24918	1.37562	0.32
Matured_Cu_skin	Cu_skin_3	1.31167	3.55688	5.48218	22.6599	17.6335	1.48777	0.577627	0.859961
Matured_Cu_skin	Cu_skin_3	0.619763	1.0817	6.80233	6.86332	18.8044	0.985738	0.682321	0.581984
Matured_Cu_skin	Cu_skin_3	0.103025	0.45427	4.61356	2.6893	4.3282	0.421361	0.453698	0.263851
Matured_Cu_skin	Cu_skin_3	1.66302	4.59242	13.0968	23.1901	43.2155	6.73142	1.24575	1.31723
Matured_Cu_skin	Cu_skin_3	1.28466	4.16222	16.0512	22.246	10.2105	4.20328	1.49078	0.693578
Matured_Cu_skin	Cu_skin_3	0.82592	1.42255	12.5098	10.0446	21.6861	6.84027	0.681965	0.687441
Matured_Cu_skin	Cu_skin_3	1.26757	2.81369	24.3335	18.7895	24.8022	9.23215	1.147	1.49418
Matured_Cu_skin	Cu_skin_3	0.399978	1.09268	9.29924	4.70451	8.76703	1.39404	0.689245	1.28267
Matured_Cu_skin	Cu_skin_3	0.41411	0.713256	5.77234	5.89616	10.1484	0.818602	1.13977	0.265137
Matured_Cu_skin	Cu_skin_3	0.224438	1.19896	11.7332	5.89954	7.25299	1.49693	1.5966	0.47752
Matured_Cu_skin	Cu_skin_3	0.68859	1.08165	18.1386	6.86297	1.44642	4.30886	1.81943	1.53424
Matured_Cu_skin	Cu_skin_3	0.725161	2.02696	12.8256	10.5708	24.6619	4.43461	1.02646	0.902048
Matured_Cu_skin	Cu_skin_3	1.05517	4.8337	7.65498	22.6586	13.0806	2.66005	1.48542	0.425282
Matured_Cu_skin	Cu_skin_3	1.6338	8.85161	8.74475	28.4591	17.5245	2.95716	1.83698	0.747815
Matured_Cu_skin	Cu_skin_3	1.61554	11.5272	7.58609	41.2542	30.9844	2.98768	1.27596	0.701568
Matured_Cu_skin	Cu_skin_3	7.18419	21.0477	12.5856	66.2895	146.512	6.38997	2.30369	1.4469
Matured_Cu_skin	Cu_skin_3	0.380603	0.5149	2.68872	3.94115	11.6287	0.537741	0.457113	0.0531673
Matured_Cu_skin	Cu_skin_3	5.00735	6.68736	22.6447	26.1748	29.4215	73.9837	2.66001	5.5959
Matured_Cu_skin	Cu_skin_3	1.02611	2.0705	13.7438	8.91451	13.1516	14.2544	1.72325	1.49656
Matured_Cu_skin	Cu_skin_3	0.918288	0.888107	9.31057	4.68716	20.3809	1.72903	1.25895	0.479226
Matured_Cu_skin	Cu_skin_3	1.121	0.839893	12.5498	7.2323	4.41509	1.14619	1.04131	0.215318
Matured_Cu_skin	Cu_skin_3	0.555311	3.58672	11.2451	10.8716	5.83229	1.95887	0.917044	0.586644
Matured_Cu_skin	Cu_skin_3	0.257975	0.739368	5.43639	3.42821	10.1153	0.506441	1.36327	0.211418
Matured_Cu_skin	Cu_skin_3	0.312795	0.775805	7.50715	3.95878	4.38028	1.10872	1.14789	0.534051
Matured_Cu_skin	Cu_skin_3	0.483149	0.77035	9.68158	4.66799	7.24914	1.43967	1.82372	0.371207
Matured_Cu_skin	Cu_skin_3	2.48251	2.66955	12.3013	10.3814	39.3832	2.81164	2.7522	0.480167
Matured_Cu_skin	Cu_skin_3	0.363667	0.801759	9.07782	8.13677	5.8202	0.99157	2.40225	0.266103
Matured_Cu_skin	Cu_skin_3	4.03764	21.5737	10.6358	94.8937	44.4433	5.7112	3.14463	1.51721
Matured_Cu_skin	Cu_skin_3	0.244496	1.4727	6.67045	5.47041	13.2062	0.771397	0.230721	0.59038
Matured_Cu_skin	Cu_skin_3	4.70922	25.7735	10.7112	100.7	30.6614	6.42479	0.688724	1.44191
Matured_Cu_skin	Cu_skin_3	0.502876	1.40495	9.77508	8.39451	14.5699	1.73047	0.343636	0.266458
Matured_Cu_skin	Cu_skin_3	0.689033	1.33869	11.9338	9.81054	7.23674	2.62079	0.682724	0.370572
Matured_Cu_skin	Cu_skin_3	0.710698	1.66238	9.36048	10.6126	16.0209	2.2119	0.572513	0.426173
Matured_Cu_skin	Cu_skin_3	0.899792	0.829731	6.74596	3.69558	20.3545	0.99078	1.14302	0.584961
Matured_Cu_skin	Cu_skin_3	0.469786	0.374008	2.19999	2.97284	11.6955	0.398506	0.574673	0.213891
Matured_Cu_skin	Cu_skin_3	0.254153	0.700399	6.11461	5.06614	7.11816	0.609814	0.78346	0.260357
Matured_Cu_skin	Cu_skin_3	0.29977	0.55074	5.65912	4.03104	4.19788	0.953573	0.770065	0.358269
Matured_Cu_skin	Cu_skin_3	0.188449	0.991449	4.55791	5.1224	4.31833	0.58856	0.565829	0.263249
Matured_Cu_skin	Cu_skin_3	0.653787	0.768099	5.43847	3.67449	10.1191	0.422196	0.568246	0.687371
Matured_Cu_skin	Cu_skin_3	0.533601	1.73615	9.06836	10.5385	15.9089	2.02749	1.47813	0.793491
Matured_Cu_skin	Cu_skin_3	0.277348	1.37578	6.39259	4.68935	8.73876	0.99253	1.60305	0.426178
Matured_Cu_skin	Cu_skin_3	0.939898	2.47506	13.067	9.66506	5.84978	2.13559	3.44923	0.695385
Matured_Cu_skin	Cu_skin_3	0.453287	1.49901	8.54194	7.19865	1.46485	1.02677	1.84261	0.267895
Matured_Cu_skin	Cu_skin_3	6.03861	32.1186	25.607	133.441	46.925	9.87887	2.65157	2.14544
Matured_Cu_skin	Cu_skin_3	4.51884	28.1654	18.2736	79.6709	41.5277	8.83647	2.68182	1.30195
Matured_DD_liver	DD_liver_1†	41.3994	13.2108	413.86	232.747	57.0999	5.67901	7.4009	10.3297
Matured_DD_liver	DD_liver_1†	41.3998	15.0716	453.647	225.591	50.1178	4.36069	9.72726	10.7124
Matured_DD_liver	DD_liver_1†	51.5038	20.047	565.703	293.595	66.3333	5.28917	12.7891	12.42
Matured_DD_liver	DD_liver_1†	52.3414	19.0657	549.263	273.444	73.0589	5.47351	10.8631	13.1869
Matured_DD_liver	DD_liver_1†	50.583	21.175	541.434	284.802	74.5907	4.41876	10.3559	10.3326
Matured_DD_liver	DD_liver_1†	51.3101	19.684	550.71	252.371	77.5506	4.62229	11.4472	12.3881
Matured_DD_liver	DD_liver_1†	52.6679	20.2431	588.436	275.838	39.6245	4.78336	8.72254	15.7107
Matured_DD_liver	DD_liver_1†	29.6504	11.2402	320.513	114.809	27.3434	1.83379	5.85191	6.16745
Matured_DD_liver	DD_liver_1†	34.4497	11.8709	360.717	229.473	52.3201	2.33701	5.56504	6.75418
Matured_DD_liver	DD_liver_1†	41.913	17.1868	476.328	247.367	79.9654	3.60239	9.36843	10.6671
Matured_DD_liver	DD_liver_1†	52.2403	19.7499	555.081	261.106	92.9543	4.84676	10.0328	13.0235
Matured_DD_liver	DD_liver_1†	56.5837	21.6177	582.64	275.817	62.7256	6.10649	11.2536	14.001
Matured_DD_liver	DD_liver_1†	51.9814	21.1604	557.094	226.222	74.4294	4.84087	8.46597	12.743
Matured_DD_liver	DD_liver_1†	52.9719	21.291	542.401	209.03	48.962	4.82808	11.2995	12.8826
Matured_DD_liver	DD_liver_1†	53.9316	21.8224	545.017	215.86	58.1155	5.71886	10.6196	12.2944
Matured_DD_liver	DD_liver_1†	27.3534	12.4634	340.747	116.89	27.4696	2.46624	6.11887	6.36337
Matured_DD_liver	DD_liver_1†	47.829	15.9745	463.346	222.126	60.0724	4.46862	7.26578	10.8172
Matured_DD_liver	DD_liver_1†	48.8622	18.3649	516.318	278.336	57.9342	4.29863	9.60172	11.0533
Matured_DD_liver	DD_liver_1†	50.5503	19.1676	563.611	290.768	76.8537	5.49691	12.0841	12.7357
Matured_DD_liver	DD_liver_1†	53.3067	23.4775	578.364	234.381	61.7893	5.61432	11.3347	13.792
Matured_DD_liver	DD_liver_1†	59.5041	27.2415	588.083	208.895	62.4957	6.17538	9.58089	13.3152
Matured_DD_liver	DD_liver_1†	54.3325	23.335	556.389	216.681	59.8395	4.84439	10.1517	11.6924
Matured_DD_liver	DD_liver_1†	51.0683	21.2114	568.508	251.313	72.807	4.99238	10.0791	12.3889
Matured_DD_liver	DD_liver_1†	43.824	20.1611	543.409	182.912	47.0667	5.16246	9.00402	11.1326
Matured_DD_liver	DD_liver_1†	45.3362	16.2936	484.279	259.929	61.7882	4.39112	7.77225	9.71799
Matured_DD_liver	DD_liver_1†	49.7758	20.4674	568.885	289.2	67.7608	5.00121	11.15	12.9687
Matured_DD_liver	DD_liver_1†	53.3693	19.2969	576.299	263.784	89.7153	5.70009	11.1367	13.9319
Matured_DD_liver	DD_liver_1†	53.489	20.7639	576.346	263.719	73.65	5.2684	8.93706	13.5279
Matured_DD_liver	DD_liver_1†	51.0958	22.3422	554.38	204.096	67.5225	4.86132	9.25896	12.1764
Matured_DD_liver	DD_liver_1†	51.1683	20.7084	556.134	177.517	53.721	4.953	12.1734	13.1188
Matured_DD_liver	DD_liver_1†	48.2637	20.303	572.253	242.071	57.576	4.69622	11.2551	13.7739
Matured_DD_liver	DD_liver_1†	43.832	22.3456	578.74	254.238	63.1707	4.88912	10.8018	13.8634
Matured_DD_liver	DD_liver_1†	47.5071	15.6983	484.413	267.988	57.4225	3.95848	10.9811	11.2963
Matured_DD_liver	DD_liver_1†	44.5507	17.34	533.248	281.564	84.9664	4.71793	10.3909	9.95639
Matured_DD_liver	DD_liver_1†	45.9226	19.191	571.91	301.064	61.0474	5.05927	11.1986	14.2562
Matured_DD_liver	DD_liver_1†	45.2624	19.5938	545.716	221.047	74.0442	5.15323	9.78456	11.7551
Matured_DD_liver	DD_liver_1†	43.9204	19.2539	509.927	188.917	46.5161	4.52846	9.02059	10.7755
Matured_DD_liver	DD_liver_1†	47.0473	19.6489	562.856	223.998	56.5165	4.76842	9.50352	13.0921
Matured_DD_liver	DD_liver_1†	45.0408	19.283	588.154	241.883	61.2416	5.35054	11.7281	13.8421
Matured_DD_liver	DD_liver_1†	44.2919	22.9931	580.193	287.357	59.9986	5.13395	13.6544	14.7843
Matured_DD_liver	DD_liver_1†	52.1593	18.6316	536.646	242.123	50.4102	4.69285	9.5363	12.8492
Matured_DD_liver	DD_liver_1†	44.0851	18.0164	516.975	296.269	62.3851	4.55501	11.2805	11.4092
Matured_DD_liver	DD_liver_1†	41.7157	15.3654	514.295	246.473	63.6433	3.8384	7.56627	12.0367
Matured_DD_liver	DD_liver_1†	43.3558	17.8057	548.893	266.582	72.5101	4.08197	9.91406	13.4338
Matured_DD_liver	DD_liver_1†	38.3407	18.2573	521.836	199.61	45.0663	4.65964	10.0182	11.7091
Matured_DD_liver	DD_liver_1†	43.5302	21.24	543.061	205.363	49.9104	3.97822	7.60245	12.7788
Matured_DD_liver	DD_liver_1†	44.7765	21.1446	599.701	276.059	53.7233	5.38393	11.9255	14.8532
Matured_DD_liver	DD_liver_1†	41.5378	20.0749	578.575	283.306	59.8211	5.36397	12.1288	14.5102
Matured_DD_liver	DD_liver_1†	57.0523	21.5765	548.1	237.316	86.6417	5.24491	9.90776	13.0795
Matured_DD_liver	DD_liver_1†	43.5288	16.7245	527.615	285.078	56.9735	5.26919	10.4513	13.7768
Matured_DD_liver	DD_liver_1†	36.3334	16.2759	492.458	280.039	85.6654	3.54818	9.91857	10.3685
Matured_DD_liver	DD_liver_1†	35.9155	15.6734	439.942	189.8	53.4105	3.05861	8.64503	9.25072
Matured_DD_liver	DD_liver_1†	40.31	20.5645	513.76	162.673	43.2834	4.18365	9.35782	10.8559
Matured_DD_liver	DD_liver_1†	42.1749	21.1396	562.901	206.806	52.4392	4.57911	10.7439	12.4963
Matured_DD_liver	DD_liver_1†	49.2639	21.8961	574.374	220.418	53.736	4.80052	11.1828	13.2381
Matured_DD_liver	DD_liver_1†	50.5792	22.754	590.289	290.354	48.3111	4.79727	13.42	15.0199
Matured_DD_liver	DD_liver_1†	52.8342	19.448	547.986	207.861	64.7257	5.96309	7.69494	14.0314
Matured_DD_liver	DD_liver_1†	48.3739	17.1465	526.02	241.777	66.6567	4.69694	9.60741	13.7577
Matured_DD_liver	DD_liver_1†	42.6039	15.8921	469.985	234.482	80.756	4.29375	9.2791	10.7926
Matured_DD_liver	DD_liver_1†	41.991	18.0763	482.467	202.75	64.3769	3.91322	8.39415	10.8545
Matured_DD_liver	DD_liver_1†	44.0641	19.4924	516.256	173.382	60.6434	4.45055	7.82384	11.83
Matured_DD_liver	DD_liver_1†	47.6557	24.028	536.945	165.149	64.7611	4.98222	10.5553	12.1325
Matured_DD_liver	DD_liver_1†	52.7647	29.6611	561.055	159.231	59.9107	5.372	12.2709	14.0706
Matured_DD_liver	DD_liver_1†	49.9981	19.9724	629.986	219.351	74.6481	6.37038	10.7384	15.2204
Matured_DD_liver	DD_liver_1†	45.572	17.687	475.174	207.709	72.8311	4.04297	9.01512	10.5423
Matured_DD_liver	DD_liver_1†	44.0402	18.2435	443.417	175.935	46.9785	4.36005	7.87915	9.39343
Matured_DD_liver	DD_liver_1†	43.468	18.2416	451.142	213.009	60.1514	4.20423	8.60915	10.8314
Matured_DD_liver	DD_liver_1†	48.632	20.9812	520.788	175.583	56.8619	4.82832	10.0583	12.3633
Matured_DD_liver	DD_liver_1†	43.4982	21.2134	505.61	152.662	43.4911	4.5364	8.79217	12.3283
Matured_DD_liver	DD_liver_1†	50.2718	27.5735	519.42	168.528	52.0112	5.18617	12.267	12.279
Matured_DD_liver	DD_liver_1†	48.2318	24.6029	536.305	156.959	67.6208	4.28664	10.2615	10.8136
Matured_DD_liver	DD_liver_1†	48.0211	19.4486	537.016	249.477	54.9919	4.40525	9.2643	11.4938
Matured_DD_liver	DD_liver_2	2.77771	0.65613	13.6795	9.33465	8.69772	0.197574	0.56983	0.159066
Matured_DD_liver	DD_liver_2	2.11149	0.686818	9.25485	8.87126	5.81678	0.14157	0.457303	0.265947
Matured_DD_liver	DD_liver_2	6.12922	2.21066	46.5152	23.4859	13.13	0.823757	1.03226	0.960503
Matured_DD_liver	DD_liver_2	9.96752	3.95432	64.1918	37.0331	29.3342	1.05663	1.61433	0.912001
Matured_DD_liver	DD_liver_2	3.5843	1.51014	27.4625	22.0819	17.3746	0.394675	0.682978	0.582545
Matured_DD_liver	DD_liver_2	16.2594	7.53478	193.646	82.049	62.5718	1.74044	3.51376	3.75994
Matured_DD_liver	DD_liver_2	20.2295	6.55012	112.976	61.6672	36.9827	1.84338	1.7445	1.78556
Matured_DD_liver	DD_liver_2	19.9684	8.13518	175.84	97.508	43.9132	2.29969	3.8095	3.43392
Matured_DD_liver	DD_liver_2	19.1641	12.2013	341.143	132.171	63.9816	3.08472	7.54514	5.51624
Matured_DD_liver	DD_liver_2	19.0118	7.01171	128.924	68.428	46.0221	2.02339	3.03459	2.11774
Matured_DD_liver	DD_liver_2	22.4322	7.08585	140.618	78.8438	22.2264	2.4523	3.49478	2.81828
Matured_DD_liver	DD_liver_2	3.83515	1.30225	17.5891	13.1638	8.63136	0.420142	0.339289	0.315705
Matured_DD_liver	DD_liver_2	1.97138	0.894243	10.9374	6.70671	7.32919	0.142703	0.460964	0.160846
Matured_DD_liver	DD_liver_2	4.34834	2.0828	27.8629	25.7968	7.24913	0.423433	0.569911	0.318178
Matured_DD_liver	DD_liver_2	4.65077	1.94394	25.4126	13.0467	20.3373	0.593966	0.913643	0.212534
Matured_DD_liver	DD_liver_2	2.98449	1.82879	48.9735	28.9957	25.0763	0.402087	0.811772	0.809298
Matured_DD_liver	DD_liver_2	6.17666	2.22519	55.3556	36.1111	14.4965	0.62096	1.93746	0.795348
Matured_DD_liver	DD_liver_2	9.97938	3.77243	61.5666	36.4519	21.9499	0.79777	1.8407	0.963423
Matured_DD_liver	DD_liver_2	7.12826	3.4955	82.0114	45.0251	33.7632	0.771716	2.53898	1.71818
Matured_DD_liver	DD_liver_2	12.1411	5.37263	114.858	59.1975	48.4373	1.54325	2.88488	1.93273
Matured_DD_liver	DD_liver_2	17.0843	9.54506	249.931	97.2993	55.9072	2.85374	5.22684	4.36612
Matured_DD_liver	DD_liver_2	11.2673	4.44945	87.6677	44.9882	27.7154	1.22127	2.52296	1.01373
Matured_DD_liver	DD_liver_2	1.38832	0.566809	5.59849	6.58905	1.44012	0.140199	0.226438	0.105349
Matured_DD_liver	DD_liver_2	2.7447	0.982824	13.0785	10.9522	2.93778	0.3718	0.577404	0.376088
Matured_DD_liver	DD_liver_2	1.63383	0.938424	12.549	11.9987	11.5603	0.0844065	1.02245	0.211417
Matured_DD_liver	DD_liver_2	2.32459	1.31947	29.7942	11.8559	14.5758	0.368939	1.4897	0.47982
Matured_DD_liver	DD_liver_2	4.5619	2.79266	63.0195	33.964	27.7966	0.341819	1.15016	0.80266
Matured_DD_liver	DD_liver_2	3.96857	3.02422	81.4494	41.519	36.2443	0.733923	1.82365	1.06055
Matured_DD_liver	DD_liver_2	4.65489	1.82443	49.6374	33.384	28.9714	0.535883	1.13883	0.794754
Matured_DD_liver	DD_liver_2	11.6295	4.53823	90.7901	62.6259	31.0437	1.06496	2.09193	1.6221
Matured_DD_liver	DD_liver_2	11.603	4.86839	120.835	51.0997	35.1319	1.22557	1.61116	1.55271
Matured_DD_liver	DD_liver_2	5.06462	2.94544	76.4581	46.499	29.3476	0.599982	1.73043	1.23445
Matured_DD_liver	DD_liver_2	2.82711	1.41654	21.3483	11.4659	21.5945	0.560607	0.565904	0.263284
Matured_DD_liver	DD_liver_2	1.31859	0.651251	8.61582	9.50906	4.31652	0.16809	0.226237	0.0526278
Matured_DD_liver	DD_liver_2	2.80594	1.14558	12.6382	15.29	13.0978	0.170014	0.34324	0.212921
Matured_DD_liver	DD_liver_2	1.91619	0.970499	13.4602	8.35694	15.9552	0.338896	0.342098	0.371372
Matured_DD_liver	DD_liver_2	2.64221	1.98323	51.5591	28.7101	14.6055	0.483441	1.60756	0.694485
Matured_DD_liver	DD_liver_2	3.36487	1.66339	47.7448	36.3025	21.86	0.368875	1.2603	0.373129
Matured_DD_liver	DD_liver_2	3.6524	2.43285	54.1696	36.9692	30.5428	0.792911	1.14343	1.01075
Matured_DD_liver	DD_liver_2	5.4063	2.24905	45.6259	50.0096	21.6997	0.56334	0.568662	0.952441
Matured_DD_liver	DD_liver_2	4.0283	1.42935	31.8792	43.3244	15.9791	0.367688	1.14204	0.79699
Matured_DD_liver	DD_liver_2	2.80324	1.6881	43.029	26.1159	24.7165	0.283085	1.02873	0.850866
Matured_DD_liver	DD_liver_2	3.98508	2.32057	27.7952	14.0617	10.1906	0.481869	0.457808	0.638978
Matured_DD_liver	DD_liver_2	7.99453	3.15547	47.0542	30.5987	20.2237	0.646901	1.02211	0.898223
Matured_DD_liver	DD_liver_2	2.74124	0.940729	17.4845	15.9557	8.69148	0.253841	0.455537	0.26492
Matured_DD_liver	DD_liver_2	1.81887	0.687424	7.02711	5.67275	4.36644	0.198372	0.228853	0.266182
Matured_DD_liver	DD_liver_2	1.72044	1.90597	32.9472	22.0463	24.5744	0.168874	1.13646	0.475859
Matured_DD_liver	DD_liver_2	2.0327	1.6087	61.2331	35.868	42.3329	0.341066	1.03286	0.694105
Matured_DD_liver	DD_liver_2	4.81236	2.26937	58.6691	35.1253	18.9764	0.341059	1.49189	0.96105
Matured_DD_liver	DD_liver_2	4.78759	2.43797	59.9038	33.0953	30.607	0.454044	1.60417	1.22611
Matured_DD_liver	DD_liver_2	4.05164	1.97544	51.7215	26.8716	24.7318	0.481542	1.82999	0.744969
Matured_DD_liver	DD_liver_2	4.79574	2.29846	48.9749	38.5944	23.3593	0.369539	1.49212	0.640801
Matured_DD_liver	DD_liver_2	10.7374	4.0507	67.2776	37.3542	21.8975	0.881134	0.688613	0.640747
Matured_DD_liver	DD_liver_2	4.99896	2.09513	27.2049	20.7596	8.75048	0.681505	0.343972	0.480093
Matured_DD_liver	DD_liver_2	7.97588	3.20403	44.0249	35.9653	21.8053	0.84912	0.685714	0.584878
Matured_DD_liver	DD_liver_2	1.45629	0.878194	6.18289	7.80604	8.63718	0.280284	0.792209	0.105306
Matured_DD_liver	DD_liver_2	1.5677	0.911536	6.71627	6.86806	10.1324	0.140917	0.455195	0.211777
Matured_DD_liver	DD_liver_2	1.71148	0.771794	9.51758	11.0765	4.35764	0.367663	0.228392	0.212516
Matured_DD_liver	DD_liver_2	2.13497	1.16722	28.845	22.063	18.8064	0.338003	1.25105	0.63496
Matured_DD_liver	DD_liver_2	3.14063	1.77882	51.0546	24.9524	17.495	0.312249	0.687708	0.69323
Matured_DD_liver	DD_liver_2	3.60389	1.87282	35.3058	25.1676	12.9774	0.308827	1.4737	0.158223
Matured_DD_liver	DD_liver_2	4.38905	2.60004	52.0723	31.492	23.23	0.339226	0.684861	0.531046
Matured_DD_liver	DD_liver_2	5.83402	2.11822	42.1816	24.4021	43.6368	0.481457	1.14354	0.319216
Matured_DD_liver	DD_liver_2	3.96473	2.06116	29.0054	19.9672	21.8204	0.538149	1.02928	0.744906
Matured_DD_liver	DD_liver_2	3.76128	1.97754	24.9751	17.2754	11.6509	0.396985	0.686975	0.426149
Matured_DD_liver	DD_liver_2	6.09783	2.54932	26.3757	14.7992	14.5555	0.736845	0.572159	0.266194
Matured_DD_liver	DD_liver_2	1.72012	0.647689	9.28649	4.60728	4.29292	0.139309	0.5625	0.31404
Matured_DD_liver	DD_liver_2	1.2605	0.770879	8.3237	8.11314	5.8033	0.141241	0.798425	0.106132
Matured_DD_liver	DD_liver_2	2.03552	0.88421	13.4956	14.9822	5.79757	0.282204	0.455792	0.212055
Matured_DD_liver	DD_liver_2	2.71483	0.965973	18.1498	10.0305	15.8807	0.140548	0.794506	0.686474
Matured_DD_liver	DD_liver_2	4.79571	2.06113	28.0473	28.8411	13.0921	0.453172	0.228727	0.638483
Matured_DD_liver	DD_liver_2	5.9651	2.31571	55.7928	40.1272	27.6023	0.594002	1.59897	0.743912
Matured_DD_liver	DD_liver_2	6.00396	2.561	68.9461	51.2911	26.3199	0.626342	1.49443	1.17662
Matured_DD_liver	DD_liver_2	3.13086	1.65888	34.3558	17.7325	17.4405	0.594257	1.14261	0.318957
Matured_DD_liver	DD_liver_2	3.90146	2.28354	59.3434	29.0037	23.2077	0.451865	1.82454	1.00802
Matured_DD_liver	DD_liver_2	3.91333	2.2704	29.1618	39.3451	21.632	0.28079	0.907018	0.474733
Matured_DD_liver	DD_liver_2	3.25036	1.7346	37.8721	36.9743	37.5695	0.337614	0.681608	0.687081
Matured_DD_liver	DD_liver_2	1.93655	0.793431	10.4281	9.5163	10.0796	0.112145	0.566023	0.105336
Matured_DD_liver	DD_liver_2	0.445471	0.36829	4.15219	2.19554	2.87918	0.0280296	1e-05	0.157966
Matured_DD_liver	DD_liver_2	0.764461	0.477521	6.1754	5.56319	5.70947	0.111166	0.561083	0.104416
Matured_DD_liver	DD_liver_2	2.31266	1.18093	16.0809	8.47411	14.2878	0.222553	0.336983	0.261299
Matured_DD_liver	DD_liver_2	7.39815	2.75022	57.2316	52.2979	23.2921	0.765295	1.03003	0.585711
Matured_DD_liver	DD_liver_2	9.13239	3.74669	79.2229	55.482	27.4044	0.926739	2.26786	0.949601
Matured_DD_liver	DD_liver_2	8.5257	3.98336	68.6796	54.735	24.4046	0.782632	2.70866	1.3127
Matured_DD_liver	DD_liver_2	4.28	1.91191	39.5508	23.3437	34.8014	0.564667	1.368	0.848609
Matured_DD_liver	DD_liver_2	2.14453	1.39001	33.4423	29.0684	23.064	0.280667	0.793293	0.52725
Matured_DD_liver	DD_liver_2	4.00725	1.86885	26.2541	25.1143	24.4609	0.560313	0.791849	0.368403
Matured_DD_liver	DD_liver_2	4.89675	2.00302	44.5843	46.8853	38.7064	0.558247	1.23975	0.891396
Matured_DD_liver	DD_liver_2	1.30264	0.631809	11.7581	7.91344	4.37801	0.14207	0.458919	0.21351
Matured_DD_liver	DD_liver_2	0.259892	0.401079	1.73432	2.22023	1.45578	1e-05	0.4578	1e-05
Matured_DD_liver	DD_liver_2	0.172914	0.142956	0.956517	2.21578	1e-05	0.0282879	0.342662	0.106281
Matured_DD_liver	DD_liver_2	1.77843	2.64946	142.952	31.3385	39.9459	0.691348	3.60571	2.48925
Matured_DD_liver	DD_liver_2	6.56119	3.14967	86.0912	40.6825	28.157	0.634794	1.16507	1.08409
Matured_DD_liver	DD_liver_2	9.10062	4.71689	98.1491	46.5975	48.526	0.858932	0.809244	1.55977
Matured_DD_liver	DD_liver_2	8.91741	3.27025	44.9691	32.8534	16.0347	0.681172	2.29203	1.06635
Matured_DD_liver	DD_liver_2	4.15335	1.80418	51.2262	33.5772	28.0953	0.690984	1.16252	1.02763
Matured_DD_liver	DD_liver_2	2.06677	1.40716	26.1689	20.5247	17.5114	0.255716	0.573627	0.800631
Matured_DD_liver	DD_liver_2	6.51701	2.37531	42.8249	30.6806	29.4394	0.544539	0.925783	0.592234
Matured_DD_liver	DD_liver_2	6.25314	1.76597	27.2715	18.3953	18.816	0.366358	0.682743	0.529404
Matured_DD_liver	DD_liver_2	2.85851	0.911134	12.7916	12.7493	10.128	0.197197	0.227497	0.370446
Matured_DD_liver	DD_liver_2	0.225031	0.343464	1.55032	1.72524	2.90886	0.0849554	0.343032	0.159594
Matured_DD_liver	DD_liver_2	0.172104	0.1992	1.0427	2.45043	5.7842	1e-05	0.113685	0.105783
Matured_DD_liver	DD_liver_2	2.31046	3.93609	151.186	33.8936	55.8859	1.00222	2.54368	2.36686
Matured_DD_liver	DD_liver_2	6.25063	3.39673	103.046	40.9988	38.3566	0.603203	2.20365	1.61879
Matured_DD_liver	DD_liver_2	9.69053	4.81272	105.595	58.565	58.5768	1.28309	1.9572	1.76759
Matured_DD_liver	DD_liver_2	8.18772	3.53677	72.7856	39.4418	38.3012	0.803109	1.50558	0.969871
Matured_DD_liver	DD_liver_2	4.77985	1.87635	35.8705	16.8916	18.7804	0.421921	1.24933	0.581242
Matured_DD_liver	DD_liver_2	5.348	2.19645	33.2648	17.9311	26.0913	0.479788	0.797705	0.742255
Matured_DD_liver	DD_liver_2	5.48864	2.02627	26.6882	19.9056	18.8527	0.395308	0.456049	0.530436
Matured_DD_liver	DD_liver_2	4.81711	1.62726	21.6942	17.4539	13.0562	0.480177	0.570251	0.583674
Matured_DD_liver	DD_liver_2	1.13439	0.795752	7.37989	7.58636	8.66489	0.112473	0.567679	0.211288
Matured_DD_liver	DD_liver_2	0.885712	0.516887	4.2545	6.42908	1e-05	0.142057	0.458877	0.106745
Matured_DD_liver	DD_liver_2	0.257605	0.340758	1.7643	3.17878	1.44297	0.0561907	0.226886	0.580566
Matured_DD_liver	DD_liver_2	1.46836	0.628403	13.1509	8.85463	5.80588	0.254348	0.912891	0.159269
Matured_DD_liver	DD_liver_2	6.03835	2.49608	81.5646	42.2377	26.5476	0.918925	1.73926	1.29469
Matured_DD_liver	DD_liver_2	20.746	3.74741	66.4965	37.7297	35.1553	0.998218	1.49708	0.482197
Matured_DD_liver	DD_liver_2	6.08573	2.52283	60.6979	32.833	23.3087	0.822571	0.91624	1.06569
Matured_DD_liver	DD_liver_2	6.86513	2.4614	48.3929	29.6731	22.0723	0.573011	1.61959	0.861148
Matured_DD_liver	DD_liver_2	4.16344	2.11382	52.4696	29.2709	27.5792	0.452195	1.48352	0.743291
Matured_DD_liver	DD_liver_2	4.11897	1.33934	23.743	13.0053	11.5844	0.451108	1.5938	0.317788
Matured_DD_liver	DD_liver_2	5.44323	2.25722	27.2202	13.532	17.4229	0.395771	0.799021	0.74348
Matured_DD_liver	DD_liver_2	0.719078	1.13237	20.9712	3.90032	5.75413	0.224072	0.904754	0.789248
Matured_DD_liver	DD_liver_2	1.7086	0.827568	9.22878	4.9146	5.8004	0.141171	0.684022	0.265198
Matured_DD_liver	DD_liver_2	0.205644	0.170015	1.30911	1.464	1.43989	1e-05	0.339602	0.052666
Matured_DD_liver	DD_liver_2	0.895548	0.541053	4.67268	3.43294	2.89407	0.112698	0.113763	0.264637
Matured_DD_liver	DD_liver_2	6.16948	3.18966	73.3375	37.8586	26.2837	0.511756	1.26278	0.801137
Matured_DD_liver	DD_liver_2	5.65903	2.9564	76.2718	48.4433	42.2976	0.73836	1.94934	1.06696
Matured_DD_liver	DD_liver_2	4.94556	2.74507	62.8355	36.8251	27.8982	0.771904	1.38524	0.698181
Matured_DD_liver	DD_liver_2	9.08627	2.75006	44.9642	38.637	16.181	1.00244	1.04082	1.12988
Matured_DD_liver	DD_liver_2	5.11635	2.17212	46.7153	34.2087	18.8801	0.508993	0.685069	0.956173
Matured_DD_liver	DD_liver_2	4.29504	1.46636	23.8187	12.8744	10.2273	0.512051	0.229728	0.374079
Matured_DD_liver	DD_liver_2	1.53812	1.40022	44.4772	21.8999	29.0417	0.169637	0.684959	0.47801
Matured_DD_liver	DD_liver_2	0.913139	0.398832	5.89994	6.13274	1.44762	0.0845576	0.113809	1e-05
Matured_DD_liver	DD_liver_2	2.55687	0.942674	16.4285	5.90352	10.161	0.339155	0.570599	0.265468
Matured_DD_liver	DD_liver_2	0.289583	0.450656	3.32047	2.18283	7.15629	1e-05	0.562612	0.157051
Matured_DD_liver	DD_liver_2	2.1141	0.881014	11.5905	10.7678	10.1091	0.281184	0.567681	0.211288
Matured_DD_liver	DD_liver_2	9.26966	3.87552	90.9402	55.9546	29.6143	0.634265	1.62975	1.4623
Matured_DD_liver	DD_liver_2	3.71371	2.15207	76.7518	40.275	37.9106	0.482629	1.03169	1.06664
Matured_DD_liver	DD_liver_2	2.64977	1.94727	47.6735	24.6587	21.8274	0.368325	1.37282	0.798369
Matured_DD_liver	DD_liver_2	3.98189	1.75197	26.425	11.6796	7.17954	0.363452	0.677328	0.262602
Matured_DD_liver	DD_liver_2	2.97541	1.33659	13.7273	15.1826	11.5607	0.422048	0.11361	0.264281
Matured_DD_liver	DD_liver_2	2.63743	1.14012	11.8515	9.08123	13.0354	0.225606	0.113869	0.31786
Matured_DD_liver	DD_liver_2	0.702006	0.368046	3.74351	2.68166	2.87727	0.112044	0.565511	0.210481
Matured_DD_liver	DD_liver_2	3.61704	1.13379	16.4819	22.2109	10.0824	0.280441	0.792653	0.263413
Matured_DD_liver	DD_liver_2	10.4794	3.20246	42.2723	41.8569	14.5297	0.905284	1.37075	0.744026
Matured_DD_liver	DD_liver_2	0.412371	0.397746	17.1085	3.66962	4.33103	0.112436	0.907989	0.422437
Matured_DD_liver	DD_liver_2	1.99729	0.705663	9.62307	6.56256	5.73732	0.251344	0.451056	0.262314
Matured_DD_liver	DD_liver_2	6.1306	2.31945	31.8419	33.2879	11.6408	0.623294	0.686381	0.372557
Matured_DD_liver	DD_liver_2	3.40058	1.87427	59.4465	26.6543	31.7471	0.533841	1.02104	0.95007
Matured_DD_liver	DD_liver_2	1.7609	1.39873	36.9717	14.994	18.857	0.367155	1.14038	0.848889
Matured_DD_liver	DD_liver_2	3.60037	1.26541	15.9899	11.887	13.1526	0.369905	0.229785	0.267265
Matured_DD_liver	DD_liver_2	2.22377	1.02613	17.4371	10.3087	8.6905	0.310215	0.683228	0.105956
Matured_DD_liver	DD_liver_2	6.3454	2.90024	41.4474	40.8886	26.0075	0.562643	0.795142	0.475631
Matured_DD_liver	DD_liver_2	7.17407	2.3838	31.8729	27.8578	28.8411	0.92656	0.680228	0.474709
Matured_DD_liver	DD_liver_2	1.89139	0.788891	21.455	16.0124	12.8853	0.306635	0.562785	0.157099
Matured_DD_liver	DD_liver_2	5.25162	1.99949	29.7151	28.04	13.0634	0.536962	0.570564	0.690174
Matured_DD_liver	DD_liver_2	2.46199	0.819828	12.7004	5.84236	2.87308	0.363612	0.338813	0.262718
Matured_DD_liver	DD_liver_2	0.54543	0.422747	3.0082	3.39758	1e-05	0.139421	0.675545	0.209529
Matured_DD_liver	DD_liver_2	6.16419	1.82211	26.6241	25.2513	20.2542	0.422527	0.909907	0.634994
Matured_DD_liver	DD_liver_2	3.02987	1.01323	21.8362	12.845	14.302	0.222774	0.449757	0.627741
Matured_DD_liver	DD_liver_2	2.26169	0.708271	20.4005	6.34286	8.6378	0.224243	0.565904	0.421254
Matured_DD_liver	DD_liver_2	1.347	0.770968	8.18819	5.1635	2.90198	0.282515	0.570369	0.106144
Matured_DD_liver	DD_liver_2	2.88657	0.96023	10.7532	11.43	14.3512	0.475023	0.451304	0.262458
Matured_DD_liver	DD_liver_2	2.06152	1.61913	20.4092	12.4747	10.1041	0.30915	0.226961	0.26398
Matured_DD_liver	DD_liver_2	0.646991	0.309676	4.30556	3.63629	2.86113	0.0835615	0.449872	1e-05
Matured_DD_liver	DD_liver_3	1.94973	1.02707	14.9078	12.2834	2.89947	0.310498	0.683851	0.159079
Matured_DD_liver	DD_liver_3	3.73442	1.42936	18.6267	9.3542	1.45266	0.424259	0.685228	0.318799
Matured_DD_liver	DD_liver_3	0.588321	0.572224	5.8343	12.0721	1.45388	0.141539	0.571504	0.159534
Matured_DD_liver	DD_liver_3	3.07264	1.94089	19.2342	15.7298	7.25194	0.451837	0.342079	0.371351
Matured_DD_liver	DD_liver_3	8.7504	4.02229	48.3129	49.3374	17.6454	0.916175	1.15604	1.18325
Matured_DD_liver	DD_liver_3	11.4283	5.33345	73.0443	80.4944	30.599	1.78733	1.60375	1.2258
Matured_DD_liver	DD_liver_3	8.54575	4.18463	56.4372	59.4803	18.9339	1.33282	1.71755	1.17198
Matured_DD_liver	DD_liver_3	4.35403	1.83512	25.7721	18.4764	12.9118	0.558665	0.676732	0.419794
Matured_DD_liver	DD_liver_3	0.483741	0.342797	3.14013	3.1978	1.4516	0.141317	0.114122	0.0530946
Matured_DD_liver	DD_liver_3	0.670114	0.795505	3.53038	4.89291	4.3311	0.0281096	0.454002	0.105611
Matured_DD_liver	DD_liver_3	3.83412	1.95067	20.8392	8.39858	4.37309	0.737934	0.573004	0.426539
Matured_DD_liver	DD_liver_3	3.20231	1.62265	18.2767	8.82481	5.78633	0.422485	0.341181	0.317465
Matured_DD_liver	DD_liver_3	2.2425	1.01898	13.4827	11.2117	1e-05	0.196033	0.678464	0.36826
Matured_DD_liver	DD_liver_3	0.225442	0.315417	0.959299	1.97531	1.45708	0.0567403	0.458211	0.10659
Matured_DD_liver	DD_liver_3	0.645784	0.309099	5.10331	4.11344	4.28369	0.166811	0.449032	0.20891
Matured_DD_liver	DD_liver_3	2.68641	0.961949	14.1078	9.25782	5.75076	0.419888	0.56514	0.525857
Matured_DD_liver	DD_liver_3	1.35293	0.651294	9.51862	4.14525	2.87787	0.224134	0.113126	0.368419
Matured_DD_liver	DD_liver_3	3.61543	1.8611	23.1353	14.0833	10.0303	0.334793	0.450608	0.73375
Matured_DD_liver	DD_liver_3	9.48834	4.13615	53.805	48.389	15.9446	1.38291	1.13957	0.636215
Matured_DD_liver	DD_liver_3	14.3048	8.49073	124.96	133.793	38.156	2.2859	2.76899	2.68387
Matured_DD_liver	DD_liver_3	12.1115	5.16433	79.6676	64.2344	21.8688	2.07221	1.60466	1.70642
Matured_DD_liver	DD_liver_3	0.876923	0.938224	8.69633	11.2617	1e-05	0.253165	0.113581	0.211372
Matured_DD_liver	DD_liver_3	0.753979	0.935021	6.77082	4.87966	2.87958	0.140167	0.67916	0.473963
Matured_DD_liver	DD_liver_3	1.61613	1.59198	14.8548	26.1931	8.6675	0.253141	0.45428	0.264189
Matured_DD_liver	DD_liver_3	8.34047	4.43482	63.1757	31.0432	14.5391	1.0191	1.25733	1.11676
Matured_DD_liver	DD_liver_3	6.80805	3.97976	55.114	51.1596	11.5561	1.32189	1.13564	0.528352
Matured_DD_liver	DD_liver_3	2.09288	0.759634	15.1496	16.2318	7.1483	0.417543	0.674381	0.156876
Matured_DD_liver	DD_liver_3	1.70521	0.939849	11.4791	10.7907	1.44723	0.366317	0.682666	0.158803
Matured_DD_liver	DD_liver_3	0.758207	0.484379	6.49105	3.43492	2.89573	0.084572	0.455312	0.158874
Matured_DD_liver	DD_liver_3	2.26369	1.22861	13.8831	13.2859	7.25952	0.226154	0.799019	0.371739
Matured_DD_liver	DD_liver_3	1.64156	0.685717	9.10345	7.87292	4.35559	0.226148	0.342427	0.26552
Matured_DD_liver	DD_liver_3	1.18331	0.935757	8.85417	10.4995	7.20462	0.280555	0.792976	0.26352
Matured_DD_liver	DD_liver_3	8.08752	3.47119	48.863	39.2004	21.6871	0.90082	1.59133	0.846122
Matured_DD_liver	DD_liver_3	15.399	7.16033	90.2074	83.1142	24.7419	2.06864	2.28842	1.11791
Matured_DD_liver	DD_liver_3	5.82555	3.04034	34.3576	29.1164	15.8827	0.871504	0.567573	0.52812
Matured_DD_liver	DD_liver_3	0.671542	0.683315	3.94613	4.16784	2.89355	0.140847	0.341228	0.158754
Matured_DD_liver	DD_liver_3	1.70821	1.51211	13.3173	8.10724	1.44977	0.451644	0.569888	0.318165
Matured_DD_liver	DD_liver_3	1.95415	1.47386	13.6365	8.05416	1.44028	0.336515	0.452926	0.263401
Matured_DD_liver	DD_liver_3	6.63205	3.85524	45.0396	32.4596	7.2557	0.988905	1.14085	1.06155
Matured_DD_liver	DD_liver_3	9.35926	4.35604	68.209	33.3146	8.73759	1.13417	0.915908	1.27836
Matured_DD_liver	DD_liver_3	1.35053	0.537071	10.7176	5.11152	2.87277	0.363572	0.451701	0.367765
Matured_DD_liver	DD_liver_3	1.27668	0.713168	8.77105	7.86057	1e-05	0.282242	0.227927	0.318125
Matured_DD_liver	DD_liver_3	0.103872	0.400752	0.182411	1.47894	1.45459	0.0566431	1e-05	0.106407
Matured_DD_liver	DD_liver_3	0.310861	0.228446	1.45575	2.45893	5.80426	0.0847589	0.342239	0.10615
Matured_DD_liver	DD_liver_3	3.00003	0.627191	12.0355	7.11913	1e-05	0.282063	0.341674	0.370911
Matured_DD_liver	DD_liver_3	0.500637	0.313992	2.59205	3.44117	7.2525	0.225936	0.456141	0.106108
Matured_DD_liver	DD_liver_3	1.82052	1.27792	16.2868	29.5888	11.5444	0.280969	1.24795	0.686163
Matured_DD_liver	DD_liver_3	2.24746	1.2006	14.254	14.5229	5.81035	0.53737	0.685196	0.106261
Matured_DD_liver	DD_liver_3	0.375189	0.648568	3.99816	2.67099	1.43291	0.0836986	0.563263	0.104822
Matured_DD_liver	DD_liver_3	0.188855	0.369047	2.71351	3.66675	4.32764	0.0842614	1.1341	0.105527
Matured_DD_liver	DD_liver_3	1.85347	1.54667	17.7043	32.0626	18.9208	0.255044	1.02982	0.266176
Matured_DD_liver	DD_liver_3	4.54678	2.47721	43.732	39.6859	11.7097	0.683983	1.03567	0.642451
Matured_DD_liver	DD_liver_3	3.23951	1.88047	21.5151	19.6275	7.2391	0.422847	1.13824	0.476606
Matured_DD_liver	DD_liver_3	3.14967	2.61836	34.2872	42.6156	10.2348	0.683232	0.459791	0.534789
Matured_DD_liver	DD_liver_3	3.13757	1.72931	22.2203	23.6792	12.9651	0.504876	0.226509	0.421529
Matured_DD_liver	DD_liver_3	3.0526	1.46261	21.4733	24.695	5.82921	0.482365	0.34371	0.852849
Matured_DD_liver	DD_liver_3	0.069775	0.144215	0.321648	1.4902	1e-05	1e-05	0.115227	0.214435
Matured_DD_liver	DD_liver_3	3.10789	0.746427	15.0928	6.42746	1e-05	0.369255	0.229381	0.426873
Matured_DD_liver	DD_liver_3	3.3787	1.37517	17.4806	7.64767	2.91164	0.340146	0.68672	0.42599
Matured_DD_liver	DD_liver_3	0.549418	0.567785	3.48247	4.88918	2.8852	0.0561763	1.02073	0.211061
Matured_DD_liver	DD_liver_3	0.450815	0.659408	5.02413	3.70314	8.74117	0.0567317	0.229071	0.159861
Matured_DD_liver	DD_liver_3	0.401242	0.346147	2.75723	6.20971	1.46579	0.114159	0.230474	0.214454
Matured_DD_liver	DD_liver_3	0.413392	0.598096	2.76773	2.94297	1.44725	0.253608	0.11378	0.211742
Matured_DD_liver	DD_liver_3	0.670267	0.767269	4.25554	3.91522	5.77612	0.112464	0.227053	0.21127
Matured_DD_liver	DD_liver_3	0.834163	0.833314	6.59198	7.17564	2.92034	1e-05	0.459181	0.160224
Matured_DD_liver	DD_liver_3	2.55788	1.03578	19.2969	10.6533	1.46203	0.512396	0.459766	0.213904
Matured_DD_liver	DD_liver_3	2.90665	1.61163	19.302	14.1255	11.6993	0.313212	0.919772	0.427919
Matured_DD_liver	DD_liver_3	4.22993	2.50407	26.8241	29.4935	4.38774	0.370203	0.574924	0.160488
Matured_DD_liver	DD_liver_3	4.05181	2.49088	24.9496	17.2577	7.27438	0.453235	0.915034	0.638572
Matured_DD_liver	DD_liver_3	0.534108	0.427327	3.85772	5.39689	5.79056	0.112745	0.11381	0.105899
Matured_DD_liver	DD_liver_3	0.173035	0.371945	0.410224	0.985481	1e-05	0.0283077	0.457203	1e-05
Matured_DD_liver	DD_liver_3	0.515633	0.369457	2.30905	1.22361	1.44415	0.16871	0.227072	0.105644
Matured_DD_liver	DD_liver_3	0.174299	0.259381	1.65288	3.2262	2.92899	0.057029	0.115136	0.0535662
Matured_DD_liver	DD_liver_3	0.154595	0.482841	2.62437	2.44572	1.44327	0.0843035	0.453866	0.158369
Matured_DD_liver	DD_liver_3	0.831083	0.629835	5.60986	5.4235	59.6459	0.0566505	1.02934	0.425685
Matured_DD_liver	DD_liver_3	0.328037	0.542405	2.95615	2.94988	11.6052	0.0847347	0.798329	0.159179
Matured_DD_liver	DD_liver_3	0.997237	0.682312	8.65062	13.2196	5.77861	0.168769	1.02218	1e-05
Matured_DD_liver	DD_liver_3	1.7336	1.27715	13.3833	9.77555	4.32656	0.365041	0.453526	0.211
Matured_DD_liver	DD_liver_3	2.06572	1.45165	13.649	8.82362	4.33916	0.225295	0.227423	0.105807
Matured_DD_liver	DD_liver_3	2.8183	1.841	20.3469	21.7976	7.30862	0.398447	1.37901	0.534648
Matured_DD_liver	DD_liver_3	1.67187	0.712478	10.8511	12.2703	1.44818	0.310166	0.341559	0.264848
Matured_DD_liver	DD_liver_3	1.64192	1.51463	7.83072	6.64426	1.45219	0.254473	0.114168	0.106232
Matured_DD_liver	DD_liver_3	2.30723	1.46289	16.5878	15.5608	2.91516	0.425697	0.687551	0.15994
Matured_DD_liver	DD_liver_3	0.241671	0.1998	1.09132	3.19516	1e-05	0.169441	0.342083	1e-05
Matured_DD_liver	DD_liver_3	1.54749	0.661249	7.64886	7.42696	4.38279	0.22756	0.22971	0.106872
Matured_DD_liver	DD_liver_3	0.929213	0.682863	3.98885	3.43007	4.33746	0.0844526	0.568337	0.211532
Matured_DD_liver	DD_liver_3	0.0522513	0.201593	0.458796	1.73591	1.46342	0.056987	0.115051	0.16058
Matured_DD_liver	DD_liver_3	0.224965	0.429203	2.96297	4.92781	5.81599	0.14155	1e-05	0.212729
Matured_DD_liver	DD_liver_3	0.849223	0.802388	10.5458	15.0525	7.28096	0.226822	0.801378	0.319574
Matured_DD_liver	DD_liver_3	0.832758	0.91797	8.40889	14.5741	13.1194	0.255441	0.687611	0.479861
Matured_DD_liver	DD_liver_3	1.7656	1.48832	16.0046	27.3571	13.0897	0.254863	0.686055	0.37238
Matured_DD_liver	DD_liver_3	1.5544	0.999512	8.37106	8.85268	2.9023	0.0847638	1e-05	0.212312
Matured_DD_liver	DD_liver_3	3.43665	1.77936	27.2953	43.989	13.1252	0.596294	0.917223	0.426733
Matured_DD_liver	DD_liver_3	5.89729	3.2599	34.44	37.6741	17.437	0.707308	1.14238	0.90353
Matured_DD_liver	DD_liver_3	0.873105	0.635214	6.71572	6.46432	1.4672	0.0857014	0.576741	0.160995
Matured_DD_liver	DD_liver_3	1.36573	0.828966	10.1096	13.0457	5.8102	0.282819	0.228393	0.212517
Matured_DD_liver	DD_liver_3	0.601144	0.198797	4.16238	6.1137	1e-05	0.16859	0.340366	0.158353
Matured_DD_liver	DD_liver_3	0.207588	0.343244	3.73662	7.38917	2.90699	0.169802	0.114271	1e-05
Matured_DD_liver	DD_liver_3	1.51296	0.966551	9.60117	6.6094	4.3337	0.168759	0.567844	0.105675
Matured_DD_liver	DD_liver_3	1.00964	0.679089	5.90513	4.38571	1e-05	0.167972	0.904313	0.210363
Matured_DD_liver	DD_liver_3	0.328647	0.257407	2.00481	2.4628	1.45335	0.0565948	0.457036	0.106317
Matured_DD_liver	DD_liver_3	0.580174	0.451441	3.68584	7.53173	2.8675	0.111663	0.450873	0.0524415
Matured_DD_liver	DD_liver_3	0.637724	0.65548	8.58097	14.7243	7.24093	0.112788	0.34156	0.211878
Matured_DD_liver	DD_liver_3	0.81367	0.458006	6.70365	8.62724	2.9092	0.113287	0.343072	0.425634
Matured_DD_liver	DD_liver_3	0.240843	0.34134	2.53768	4.40891	2.89087	0.08443	1e-05	0.105738
Matured_DD_liver	DD_liver_3	1.73778	0.910384	9.47248	11.269	5.78265	0.168887	0.454619	0.475896
Matured_DD_liver	DD_liver_3	4.03871	2.20712	28.6252	25.5843	12.941	0.531931	0.791304	0.683707
Matured_DD_liver	DD_liver_3	3.91113	2.13642	28.746	34.8045	11.7365	0.514158	0.692021	0.482938
Matured_DD_liver	DD_liver_3	0.737473	0.765671	7.81568	8.5467	1.44102	0.0841723	0.45316	0.0527075
Matured_DD_liver	DD_liver_3	1.14109	0.657511	7.3779	5.66181	2.90534	0.19799	0.685235	0.0531337
Matured_DD_liver	DD_liver_3	0.255555	0.338045	1.48098	1.69803	2.86296	0.083615	0.45016	0.209434
Matured_DD_liver	DD_liver_3	0.31309	0.373887	2.7491	3.46719	2.92294	0.142278	0.114898	0.0534554
Matured_DD_liver	DD_liver_3	0.172286	0.341847	1.17996	2.94363	1e-05	0.0281851	0.341417	0.0529474
Matured_DD_liver	DD_liver_3	0.0861382	0.227885	1.49756	1.71703	2.895	0.112734	0.455197	0.105889
Matured_DD_liver	DD_liver_3	0.58834	0.257509	3.09957	4.92757	1e-05	0.084926	0.571523	0.0531795
Matured_DD_liver	DD_liver_3	0.431015	0.313578	3.13361	2.94569	1e-05	0.141024	0.569424	0.794765
Matured_DD_liver	DD_liver_3	1.0172	0.59865	8.94669	11.2918	5.79436	0.169229	0.45554	0.423875
Matured_DD_liver	DD_liver_3	0.964286	0.854161	8.7996	9.56171	2.89362	0.225361	0.341235	0.158758
Matured_DD_liver	DD_liver_3	1.0899	0.686529	4.92168	7.88224	1.45358	0.226416	0.685665	0.212668
Matured_DD_liver	DD_liver_3	4.61394	1.40536	28.3286	43.4667	10.2019	0.397273	0.802053	0.479765
Matured_DD_liver	DD_liver_3	5.16487	2.57649	35.3272	44.3722	8.82636	0.515561	0.925212	0.484256
Matured_DD_liver	DD_liver_3	3.66255	2.2387	29.7663	41.0263	17.5015	0.567938	0.802626	0.586798
Matured_DD_liver	DD_liver_3	1.21576	0.689226	7.73178	11.128	8.75576	0.170479	0.573632	0.0533759
Matured_DD_liver	DD_liver_3	1.6798	1.20264	15.4186	25.15	7.27526	0.198314	1e-05	0.425766
Matured_DD_liver	DD_liver_3	0.327356	0.256395	2.26924	2.45313	1.44764	0.169117	0.11381	1e-05
Matured_DD_liver	DD_liver_3	0.205888	0.340433	2.03378	3.42003	2.88318	0.140343	0.226669	0.263642
Matured_DD_liver	DD_liver_3	0.0858621	0.425916	2.12605	0.73351	2.88572	0.0561865	0.794043	0.263874
Matured_DD_liver	DD_liver_3	0.187929	0.282489	1.66512	1.70275	2.87093	0.0838478	0.451413	0.0525044
Matured_DD_liver	DD_liver_3	0.0691602	0.228711	0.273269	1.23089	1.45274	0.0282857	1e-05	0.265682
Matured_DD_liver	DD_liver_3	0.39453	0.368719	2.48518	3.41927	2.88254	0.0561244	0.679856	0.316299
Matured_DD_liver	DD_liver_3	0.359037	0.621932	6.0799	5.59887	1e-05	0.195789	0.564682	0.105086
Matured_DD_liver	DD_liver_3	0.464419	0.625705	4.16847	4.65321	4.33571	0.056279	0.227243	0.158585
Matured_DD_liver	DD_liver_3	2.51528	1.22491	17.6987	9.07589	13.0278	0.310025	0.341405	0.582401
Matured_DD_liver	DD_liver_3	2.28283	1.73122	18.5374	35.1915	17.306	0.505435	1.36056	1.21324
Matured_DD_liver	DD_liver_3	3.53307	1.50301	22.6794	32.9664	11.5284	0.67339	0.906335	0.843335
Matured_DD_liver	DD_liver_3	4.6304	2.15511	28.8217	25.1504	11.5276	0.645288	0.566421	0.421639
Matured_DD_liver	DD_liver_3	0.666194	0.706118	4.58965	3.16179	1e-05	0.0838355	0.225673	0.104993
Matured_DD_liver	DD_liver_3	1.07007	0.926805	9.79853	12.8175	7.1357	0.166723	0.112199	0.417599
Matured_DD_liver	DD_liver_3	0.59728	0.366821	4.22553	2.91571	1.43385	0.223342	0.338178	0.209781
Matured_DD_liver	DD_liver_3	0.621899	0.399895	5.2331	4.18138	4.35443	0.197827	0.57056	0.15927
Matured_DD_liver	DD_liver_3	0.29461	0.40117	3.28681	1.97398	2.91221	0.226809	0.457903	0.213037
Matured_DD_liver	DD_liver_3	0.274229	0.198377	1.17384	3.41644	1.44008	0.112156	0.339647	0.263365
Matured_DD_liver	DD_liver_3	0.086065	0.170769	0.45342	2.20573	1.44627	0.0281596	0.113703	0.0528996
Matured_DD_liver	DD_liver_3	0.0682715	0.338658	0.314718	2.18713	1e-05	0.0279222	0.225488	0.0524536
Matured_DD_liver	DD_liver_3	0.275093	0.369576	2.7174	3.18241	1e-05	0.140637	0.113573	0.211356
Matured_DD_liver	DD_liver_3	0.467334	0.486534	3.28276	1.47866	1e-05	0.0849484	0.457338	0.212774
Matured_DD_liver	DD_liver_3	3.78826	3.53053	36.6952	29.4206	15.9149	0.732421	1.0237	0.687949
Matured_DD_liver	DD_liver_3	6.05141	2.95304	46.1313	36.2912	13.1119	0.879353	1.25991	1.06575
Matured_DD_liver	DD_liver_3	2.51863	1.63709	16.6548	14.8388	4.37835	0.22733	0.688432	0.640578
Matured_DD_liver	DD_liver_3	4.02187	1.94081	23.8258	15.4834	17.4039	0.310624	0.456086	0.371335
Matured_DD_liver	DD_liver_3	2.09646	1.10813	10.9996	10.0314	2.88768	0.253011	0.340535	0.369675
Matured_DD_liver	DD_liver_3	0.190205	0.486048	1.68529	2.46197	1e-05	0.113151	0.11422	0.106281
Matured_DD_liver	DD_liver_3	1.25335	0.709724	6.19601	4.40022	4.32776	0.224703	0.226826	0.158294
Matured_DD_liver	DD_liver_3	1.17034	0.682992	11.4701	11.0273	5.78437	0.225249	0.113689	0.317358
Matured_DD_liver	DD_liver_3	1.14811	1.13337	8.26047	6.83158	5.75921	0.140169	0.565971	0.210652
Matured_DD_liver	DD_liver_3	0.655432	0.611345	3.89573	2.87142	2.82414	0.109975	0.222028	0.36154
Matured_DD_liver	DD_liver_3	0.084888	0.25265	0.536662	1.93384	1e-05	0.0277745	0.112148	0.0521761
Matured_DD_liver	DD_liver_3	0.0841932	0.167055	0.310491	1.19875	2.82963	0.0550944	0.22246	1e-05
Matured_DD_liver	DD_liver_3	3.41657	1.04511	11.6998	6.81038	5.74133	0.50304	0.677057	0.419996
Matured_DD_liver	DD_liver_3	1.06259	0.538431	5.28208	4.14837	1e-05	0.168228	0.339634	0.158013
Matured_DD_liver	DD_liver_3	3.8811	1.67533	23.4778	10.2695	5.77165	0.589979	0.680632	0.263883
Matured_DD_liver	DD_liver_3	4.57244	2.44436	29.5681	21.7826	11.5545	0.562428	1.02193	0.369794
Matured_DD_liver	DD_liver_3	1.63825	0.809854	11.3447	13.7068	7.0953	0.248668	0.33469	0.0519043
Matured_DD_liver	DD_liver_3	1.2096	0.676077	7.35989	7.51968	2.86291	0.167227	0.562689	0.104715
Matured_DD_liver	DD_liver_3	0.325137	0.169772	2.43417	2.4365	1.43783	0.0559904	0.226078	0.105181
Matured_DD_liver	DD_liver_3	0.305934	0.365342	2.10424	2.66196	1.42807	0.0556103	0.673628	0.0522336
Matured_DD_liver	DD_liver_3	0.186815	0.224652	0.40263	2.17628	5.70786	0.0277837	0.22437	1e-05
Matured_DD_liver	DD_liver_3	0.413691	0.570027	6.94704	5.89019	4.34489	0.0845973	0.455448	0.264868
Matured_DD_liver	DD_liver_3	0.171448	0.226789	1.98714	1.46466	7.20269	0.084144	0.339756	0.0526899
Matured_DD_liver	DD_liver_3	0.307233	0.282225	2.33798	3.40233	2.86826	1e-05	0.225496	0.0524554
Matured_DD_liver	DD_liver_3	0.0855942	0.481198	0.992066	0.974962	1.43836	0.0280056	0.678484	0.15783
Matured_DD_liver	DD_liver_3	0.0338361	0.139869	0.44565	1.44529	1e-05	0.0830314	0.335263	0.103986
Matured_DD_liver	DD_liver_3	0.444252	0.33903	4.45589	5.10891	1.43565	0.19567	0.225736	0.157533
Matured_DD_liver	DD_liver_3	0.978283	0.340543	5.47039	5.86481	1.44206	0.196543	0.226743	0.0527455
Matured_DD_liver	DD_liver_3	1.5587	1.09255	11.7821	15.921	8.54119	0.360319	1.34298	0.104136
Matured_DD_liver	DD_liver_3	0.578614	0.6472	5.15526	3.14997	2.85978	0.0556814	1e-05	0.261502
Matured_DD_liver	DD_liver_3	0.238806	0.338454	3.05541	3.64302	2.86642	0.0837161	0.225352	0.157266
Matured_DD_liver	DD_liver_3	0.407244	0.3928	2.50308	2.1744	1.42573	0.0832788	0.112088	0.156444
Matured_DD_liver	DD_liver_3	0.324966	0.0848412	1.62192	1.94817	1.43707	0.0559609	0.225959	0.210252
Matured_DD_liver	DD_liver_3	0.185879	0.363229	1.46891	2.16537	1.41981	0.0552888	0.223245	0.155795
Matured_DD_liver	DD_liver_3	0.170001	0.224875	2.37339	2.90459	1.42838	0.111245	1e-05	0.156735
Matured_DD_liver	DD_liver_3	0.377435	0.425512	2.71153	3.90834	1e-05	0.112266	0.339981	0.210899
Matured_DD_liver	DD_liver_3	0.416157	0.630768	6.16628	7.90041	4.3708	0.0851016	0.687245	0.159869
Matured_DD_liver	DD_liver_3	0.328705	0.457692	4.23817	5.17279	1e-05	0.141512	0.228558	1e-05
Matured_DD_liver	DD_liver_3	0.274453	0.368716	2.3496	2.68654	2.88251	0.14031	0.113308	0.052716
Matured_DD_liver	DD_liver_3	0.120601	0.341849	1.81533	1.96244	1.44759	0.112741	0.682838	0.105896
Matured_DD_liver	DD_liver_3	0.49968	0.142451	1.40702	1.7173	1.44773	0.028188	0.113817	0.317717
Matured_DD_liver	DD_liver_3	1.71159	1.02912	10.7478	16.2465	7.26318	0.0848507	1e-05	0.318794
Matured_DD_liver	DD_liver_3	1.92959	0.762343	12.4148	13.129	2.86952	0.335226	0.563988	0.209914
Matured_DD_liver	DD_liver_3	0.446843	0.596763	2.44466	2.2023	1.44403	0.196811	0.567631	0.21127
Matured_DD_liver	DD_liver_3	0.449802	1.08701	15.6765	4.68009	4.36076	0.452833	2.39983	0.265835
Matured_DD_liver	DD_liver_3	0.880787	0.656794	4.59479	4.42615	2.90218	0.0565068	1.59714	0.106151
Matured_DD_liver	DD_liver_3	0.713414	0.46034	4.81272	2.72523	2.92402	0.113864	0.344821	0.160426
Matured_DD_liver	DD_liver_3	0.770125	0.70744	5.36462	7.06642	2.87589	0.167985	0.226096	0.0525949
Matured_DD_liver	DD_liver_3	0.154597	0.31243	3.07689	3.91321	4.32986	0.0562031	0.340404	0.158371
Matured_DD_liver	DD_liver_3	0.708944	0.829139	11.4782	19.4495	7.26426	0.25459	0.45688	0.478262
Matured_DD_liver	DD_liver_3	1.29108	0.740058	6.12166	5.14712	5.78555	0.281619	0.227424	0.158711
Matured_DD_liver	DD_liver_3	0.781553	0.631785	4.34623	2.47286	1.45928	0.0568259	0.229451	0.160126
Matured_DD_liver	DD_liver_3	0.396909	0.256807	2.18197	0.982826	1.44996	0.0282315	0.341979	0.159104
Matured_DD_liver	DD_liver_3	0.051626	0.341452	0.725288	0.735058	1e-05	0.0563051	1e-05	0.105772
Matured_DD_liver	DD_liver_3	0.690877	0.228471	3.2303	7.13168	8.70733	0.0565121	0.342276	0.212323
Matured_DD_liver	DD_liver_3	0.64366	0.402702	4.90323	4.7061	10.2317	0.142297	0.114913	0.21385
Matured_DD_liver	DD_liver_3	3.39315	1.42399	18.1939	16.6763	5.78882	0.366312	0.341328	0.42347
Matured_DD_liver	DD_liver_3	1.03675	0.97141	7.96534	5.90455	1.45183	0.197875	0.456559	0.212412
Matured_DD_liver	DD_liver_3	1.24367	0.999634	10.7381	4.18094	14.5133	0.452129	0.684601	0.265422
Matured_DD_liver	DD_liver_3	3.11478	1.73604	16.041	8.22195	11.7623	0.429407	0.693543	0.484
Matured_DD_liver	DD_liver_3	0.413829	0.31362	2.18019	2.94608	1e-05	0.169251	0.3417	0.158974
Matured_DD_liver	DD_liver_3	1.30205	0.906495	9.8833	12.1966	2.87897	0.196193	0.679016	0.210606
Matured_DD_liver	DD_liver_3	0.138486	0.400724	1.13999	1.97178	1e-05	0.0566391	0.114348	0.2128
Matured_DD_liver	DD_liver_3	1.81923	0.859452	8.71718	8.38748	4.36731	0.141723	0.343348	0.372729
Matured_DD_liver	DD_liver_3	0.467257	0.572299	1.77787	1.47842	2.90814	1e-05	0.342947	0.212739
Matured_DD_liver	DD_liver_3	0.706725	0.142507	2.54272	2.20883	5.79321	1e-05	0.113862	0.0529739
Matured_DD_liver	DD_liver_3	0.138205	0.314215	2.6394	1.22986	1.45153	0.0282621	0.456466	0.053092
Matured_DD_liver	DD_liver_3	0.240945	0.369942	2.22141	1.47026	2.89209	0.0844657	0.113685	0.0528913
Matured_DD_liver	DD_liver_3	0.534055	0.25637	4.17499	5.15106	1.4475	0.0281835	0.341397	0.264722
Matured_DD_liver	DD_liver_3	0.584691	0.568693	4.93761	7.83521	8.66945	0.112532	0.567978	0.158549
Matured_DD_liver	DD_liver_3	1.35372	0.651676	6.13883	4.39166	4.31934	0.0840997	0.565962	0.105324
Matured_DD_liver	DD_liver_3	2.01407	1.28086	9.25042	7.10787	5.7855	0.16897	0.227422	0.264517
Matured_DD_liver	DD_liver_3	0.862016	0.997733	8.4924	6.13675	11.5885	0.253839	0.341649	0.317901
Matured_DD_liver	DD_liver_3	1.03745	1.11501	12.7987	5.66234	30.509	0.141434	0.571083	0.37197
Matured_DD_liver	DD_liver_3	0.205825	0.453771	1.9428	4.39584	1.44115	0.0561199	0.2266	0.105425
Matured_DD_liver	DD_liver_3	0.222386	0.197999	1.66729	2.1921	1e-05	0.0279856	0.678001	0.157718
Matured_DD_liver	DD_liver_3	0.482531	0.341939	1.36186	1.22685	4.34391	0.0845782	0.227673	0.105923
Matured_DD_liver	DD_liver_3	1.12123	1.05532	6.95211	3.92966	4.34807	0.253977	0.22789	0.159037
Matured_DD_liver	DD_liver_3	0.103875	0.400765	1.50494	1.47899	1e-05	0.0849675	0.343081	0.106411
Matured_DD_liver	DD_liver_3	0.290458	0.423766	2.29534	3.40577	2.87116	0.0838544	0.225724	0.210034
Matured_DD_liver	DD_liver_3	0.798691	0.717732	5.76282	4.69708	2.91772	0.0568096	0.45877	0.10672
Matured_DD_liver	DD_liver_3	0.190342	0.257504	2.23347	2.21736	1.4539	0.0283081	0.114302	0.0531786
Matured_DD_liver	DD_liver_3	0.241105	0.341712	0.998033	2.20686	1.44701	0.028174	0.113761	0.0529266
Matured_DD_liver	DD_liver_3	1.11742	0.739057	5.56996	8.07739	1e-05	0.0843714	0.227116	0.211329
Matured_DD_liver	DD_liver_3	0.54777	0.481169	4.82476	4.63079	5.75309	0.168023	0.678443	0.263035
Matured_DD_liver	DD_liver_3	0.895651	0.626555	4.76396	4.41429	2.8944	0.140889	0.113776	0.158801
Matured_DD_liver	DD_liver_3	0.923566	0.749146	9.18049	8.18765	1.46415	0.228062	0.575541	0.374874
Matured_DD_liver	DD_liver_3	0.308793	0.595682	4.56414	3.17535	1.44141	0.11226	0.226641	0.0527217
Matured_DD_liver	DD_liver_3	0.43152	0.428107	2.45526	1.96609	1.45029	0.112951	0.456073	0.159139
Matured_DD_liver	DD_liver_3	0.361163	0.341245	4.30379	3.42819	1.44503	0.112542	0.22721	0.105708
Matured_DD_liver	DD_liver_3	1.16951	0.511881	7.15807	5.63218	1.44507	0.0281362	0.340825	0.211422
Matured_DD_liver	DD_liver_3	1.26665	0.860705	13.072	14.3289	7.28946	0.227087	0.458465	0.58657
Matured_DD_liver	DD_liver_3	1.04257	0.976861	6.63689	6.4325	1.45998	0.227412	0.573901	0.213604
Matured_DD_liver	DD_liver_3	0.412567	0.511631	2.71693	3.18185	1.44436	0.140612	0.340658	1e-05
Matured_DD_liver	DD_liver_3	0.548975	0.255297	3.47966	1.95409	5.76574	0.140327	1e-05	0.158168
Matured_DD_liver	DD_liver_3	0.169844	0.168501	1.92381	2.41826	1e-05	0.0277856	0.336578	0.104394
Matured_DD_liver	DD_liver_3	0.120839	0.114175	1.1823	1.47474	2.9009	0.141205	0.228063	0.21221
Matured_DD_liver	DD_liver_3	0.310171	0.455879	1.63408	2.20813	4.34353	0.0281903	0.341479	0.0529571
Matured_DD_liver	DD_liver_3	1.00885	0.933021	5.76541	9.73845	4.31013	0.307708	1e-05	0.262749
Matured_DD_liver	DD_liver_3	1.06634	0.796273	6.93167	6.36692	5.78038	0.0844102	0.568051	0.105713
Matured_DD_liver	DD_liver_3	1.33525	0.764246	11.3184	8.04332	1.43834	0.476088	1e-05	0.263047
Matured_DD_liver	DD_liver_3	1.17047	0.711529	8.4335	8.82282	2.89251	0.140797	0.341104	0.105798
Matured_DD_liver	DD_liver_3	0.872599	0.565816	4.3718	3.41056	1.4376	0.0839723	0.113021	0.105165
Matured_DD_liver	DD_liver_3	1.02941	0.680847	5.37808	2.68709	1.44155	0.112271	0.113332	1e-05
Matured_DD_liver	DD_liver_3	0.534526	0.684258	3.67905	5.64662	2.89755	0.0846251	0.341698	0.211964
Matured_DD_liver	DD_liver_3	0.31215	0.516136	3.70015	4.69134	5.82832	0.14185	0.343657	0.266475
Matured_DD_liver	DD_liver_3	1.05405	0.82857	6.4179	5.65863	5.80742	0.197879	1e-05	0.477935
Matured_DD_liver	DD_liver_3	0.684028	0.622068	5.40554	5.84357	1.43684	0.0839278	0.790727	0.262772
Matured_DD_liver	DD_liver_3	0.558582	0.51953	3.54055	4.47366	1e-05	0.17134	0.230612	0.107291
Matured_DD_liver	DD_liver_3	0.259479	0.28603	1.91383	2.9556	2.90693	0.0282997	0.342805	0.106325
Matured_DD_liver	DD_liver_3	0.154082	0.169849	0.721563	1.46257	1.43848	0.0560159	0.11309	0.105229
Matured_DD_liver	DD_liver_3	0.224079	0.313511	2.17943	2.45421	2.89655	0.0281987	0.455442	0.0529729
Matured_DD_liver	DD_liver_3	0.345863	0.28594	1.95878	2.70844	1e-05	0.169744	0.342696	0.159438
Matured_DD_liver	DD_liver_3	0.120011	0.170089	0.722581	1.22052	1e-05	0.0560949	0.226499	0.158066
Matured_DD_liver	DD_liver_3	3.15	1.46758	17.0078	12.3895	5.84904	0.284709	0.804718	0.213937
Matured_DD_liver	DD_liver_3	4.45702	2.22803	27.2126	21.1532	11.612	0.452184	0.912912	0.530909
Matured_DD_liver	DD_liver_3	2.93549	1.69452	21.2303	18.3012	10.2161	0.340993	0.229477	0.427051
Matured_DD_liver	DD_liver_3	0.189488	0.142417	1.49743	0.981077	1.44738	0.0845437	0.22758	0.15882
Matured_DD_liver	DD_liver_3	0.411438	0.3685	1.89664	4.14949	2.88082	0.0280455	0.452968	0.10537
Matured_DD_liver	DD_liver_3	1.1966	0.716871	7.35478	3.70378	2.91423	0.226966	0.343665	0.159888
Matured_DD_liver	DD_liver_3	0.866839	0.831318	10.595	7.89899	8.74003	0.311983	0.343561	0.42624
Matured_DD_liver	DD_liver_3	0.845044	0.741408	7.49567	6.87534	1e-05	0.16928	0.569596	0.212001
Matured_DD_liver	DD_liver_3	0.746347	0.430491	4.93787	4.44834	1.45836	0.11358	0.34396	0.106684
Matured_DD_liver	DD_liver_3	0.56589	0.170126	4.15575	4.63901	1.44082	0.196375	0.339824	0.263502
Matured_DD_liver	DD_liver_3	0.309007	0.624481	5.56217	7.33281	1e-05	0.196591	0.566996	0.211033
Matured_DD_liver	DD_liver_3	0.609288	0.662039	7.016	4.21363	2.92535	0.170874	0.689954	0.106999
Matured_DD_liver	DD_liver_3	0.155065	0.370352	1.81541	1.96252	4.34295	0.197305	0.341433	0.05295
Matured_DD_liver	DD_liver_3	0.0687776	0.341169	0.271758	1.22408	1e-05	0.0562584	0.11358	0.0528424
Matured_DD_liver	DD_liver_3	1.07482	0.802609	7.26082	4.44294	10.1961	0.283606	0.458056	0.213108
Matured_DD_liver	DD_liver_3	5.21182	2.34767	31.9275	31.3098	24.7323	0.623184	1.14377	1.11748
Matured_DD_liver	DD_liver_3	2.86632	1.57981	21.3698	23.2499	5.8384	0.397868	1.03275	0.373709
Matured_DD_liver	DD_liver_3	0.429565	0.454579	2.94202	1.95718	4.33115	0.0562197	0.113502	0.211224
Matured_DD_liver	DD_liver_3	1.87943	0.904035	9.49643	10.7039	4.30674	0.279515	0.225724	0.315051
Matured_DD_liver	DD_liver_3	1.60553	0.656545	9.04965	7.37412	7.25268	0.0564854	0.57019	0.212222
Matured_DD_liver	DD_liver_3	1.711	1.31454	20.3956	8.8587	10.1649	0.650298	0.342491	0.26557
Matured_DD_liver	DD_liver_3	1.36086	1.28174	12.2062	10.7917	14.4737	0.225448	0.682734	0.529397
Matured_DD_liver	DD_liver_3	0.501697	0.686524	3.41781	3.20214	2.90715	0.113207	0.34283	0.0531666
Matured_DD_liver	DD_liver_3	0.39275	0.338821	3.41858	3.40384	5.73907	0.083807	0.225597	0.157436
Matured_DD_liver	DD_liver_3	1.10036	0.767573	6.5217	5.38556	4.33381	0.168763	0.227143	0.158516
Matured_DD_liver	DD_liver_3	0.813957	0.629981	6.34106	2.71237	2.91023	0.169991	0.343194	0.106446
Matured_DD_liver	DD_liver_3	0.411062	0.396483	3.06795	2.19478	2.87819	0.0840596	0.113138	4.05305
Matured_DD_liver	DD_liver_3	0.711629	0.373091	4.75496	3.95406	1.45835	0.11358	0.343958	0.160025
Matured_DD_liver	DD_liver_3	5.25749	2.01705	26.431	36.2053	5.77444	0.758911	0.453974	0.580824
Matured_DD_liver	DD_liver_3	0.708289	0.457033	3.95903	9.83874	5.80603	0.0282616	0.456458	0.106182
Matured_DD_liver	DD_liver_3	0.484017	0.285827	1.95801	2.70738	1e-05	0.0565591	0.228374	0.159375
Matured_DD_liver	DD_liver_3	0.546986	0.650063	5.35817	2.43377	1.43622	0.111855	0.451649	0.0525317
Matured_DD_liver	DD_liver_3	2.54143	1.33449	14.0224	10.2688	8.65688	0.140462	0.340293	0.316638
Matured_DD_liver	DD_liver_3	2.04962	0.683501	7.3046	4.90467	1.44717	0.253594	0.113773	0.105865
Matured_DD_liver	DD_liver_3	2.87461	2.16809	24.7536	17.2333	91.8097	0.550025	1.33253	0.309977
Matured_DD_liver	DD_liver_3	1.05042	1.17658	14.6828	17.6094	44.129	0.388032	0.783397	0.416538
Matured_DD_liver	DD_liver_3	0.74131	0.883678	8.7646	16.9369	14.4852	0.197424	0.11388	0.370873
Matured_DD_liver	DD_liver_3	0.708459	0.585714	7.77583	13.6897	7.08644	0.193167	0.222848	0.155518
Matured_DD_liver	DD_liver_3	1.6097	1.43098	14.3621	16.0188	10.1801	0.339793	0.343003	0.319161
Matured_DD_liver	DD_liver_3	0.396644	0.855451	5.1787	3.19205	7.24496	0.141063	0.34175	0.529991
Matured_DD_liver	DD_liver_3	1.16195	0.593334	7.51691	6.56895	4.30719	0.279544	0.225748	0.210056
Matured_DD_liver	DD_liver_3	1.23367	0.736618	8.39507	7.31884	10.0776	0.112124	0.33955	0.210632
Matured_DD_liver	DD_liver_3	0.859896	0.540294	5.30036	5.63193	1e-05	0.0844049	0.340809	0.0528532
Matured_DD_liver	DD_liver_3	0.930351	0.313362	4.26604	3.43427	1e-05	0.197298	0.113807	1e-05
Matured_DD_liver	DD_liver_3	0.119431	0.0846335	0.494375	1.94341	2.8671	0.111648	1e-05	0.0524343
Matured_DD_liver	DD_liver_3	0.306809	0.479121	2.55925	1.9415	1e-05	0.111539	0.337777	0.052383
Matured_DD_liver	DD_liver_3	1.02128	0.731761	6.50139	5.33176	7.15085	0.139231	0.449748	0.209243
Matured_DD_liver	DD_liver_3	3.20016	1.39398	17.494	13.9633	5.78245	0.478496	0.681906	0.423004
Matured_DD_liver	DD_liver_3	2.33658	2.99204	32.3482	21.0117	47.236	0.488595	0.812347	0.701889
Matured_DD_liver	DD_liver_3	2.96334	1.8232	29.3176	11.284	40.5325	1.26834	1.02426	0.688321
Matured_DD_liver	DD_liver_3	1.88386	1.03832	14.3359	11.6728	11.7249	0.22829	0.806562	0.375249
Matured_DD_liver	DD_liver_3	1.31826	0.430211	8.08734	4.93938	1.45741	0.198636	0.687471	0.159921
Matured_DD_liver	DD_liver_3	1.43061	0.692341	9.46713	4.96811	4.39766	0.256874	0.345735	0.268085
Matured_DD_liver	DD_liver_3	0.760777	0.943452	13.3449	5.16984	24.6971	0.198004	0.114214	0.318824
Matured_DD_liver	DD_liver_3	2.72049	2.16264	27.884	29.5476	23.4442	0.399412	0.921566	0.857507
Matured_DD_liver	DD_liver_3	0.915212	0.399738	6.59565	7.86773	2.90181	0.254249	0.342201	0.318414
Matured_DD_liver	DD_liver_3	0.606911	0.401408	3.06038	2.22205	1e-05	0.14184	0.343631	0.159873
Matured_DD_liver	DD_liver_3	2.60828	0.942525	10.0557	7.1323	2.90269	0.254326	0.342305	0.371596
Matured_DD_liver	DD_liver_3	0.766894	0.461109	2.43334	2.97795	2.92891	0.085541	0.345397	1e-05
Matured_DD_liver	DD_liver_3	1.31724	0.659142	7.53316	5.42908	1.45627	0.113418	0.457956	0.159796
Matured_DD_liver	DD_liver_3	3.7871	1.75219	22.2398	11.1305	10.2174	0.312618	0.918025	0.533883
Matured_DD_liver	DD_liver_3	4.75498	2.65931	31.774	20.4102	13.2195	0.600578	0.577383	0.376074
Matured_DD_liver	DD_liver_3	1.97887	2.02693	18.3136	13.9631	223.654	0.515683	1.6195	0.645827
Matured_DD_liver	DD_liver_3	1.84325	1.19633	12.5243	8.58465	36.1855	0.28182	1.02414	0.105883
Matured_DD_liver	DD_liver_3	0.485597	0.688224	4.97952	4.44471	1.45717	1e-05	0.22912	0.213193
Matured_DD_liver	DD_liver_3	2.03757	0.599585	10.5981	10.8177	7.25427	0.282489	0.114063	0.159202
Matured_DD_liver	DD_liver_3	1.5602	0.992217	8.12931	11.2292	4.32167	0.16829	0.679521	0.158072
Matured_DD_liver	DD_liver_3	0.207983	0.143291	2.51104	1.72742	1e-05	0.0850626	0.457954	0.0532651
Matured_DD_liver	DD_liver_3	3.282	0.947528	14.7291	5.43942	4.37715	0.53976	0.573537	0.320202
Matured_DD_liver	DD_liver_3	0.20541	0.169821	0.721446	0.974885	1e-05	0.0560068	0.452287	0.0526061
Matured_DD_liver	DD_liver_3	0.12133	0.0859793	0.456578	23.9385	4.36904	0.0567116	0.572474	0.0532681
Matured_DD_liver	DD_liver_3	0.171855	0.113664	0.588504	3.67035	2.88792	0.112459	0.340563	0.0528151
Matured_DD_liver	DD_liver_3	0.171744	0.255578	0.769082	2.20078	1e-05	0.0842892	0.226895	0.158342
Matured_DD_liver	DD_liver_3	0.754856	0.36877	3.97684	2.1984	1.44147	0.112264	0.793275	0.105448
Matured_DD_liver	DD_liver_3	3.44825	1.88154	20.9824	15.22	5.79458	0.310264	0.341668	0.423891
Matured_DD_liver	DD_liver_3	4.06644	1.80255	23.1555	16.7536	8.7235	0.311394	0.800127	0.425434
Matured_DD_liver	DD_liver_3	7.55937	5.15706	72.781	55.4465	161.379	1.15308	2.32794	1.62459
Matured_DD_liver	DD_liver_3	2.91636	1.95183	23.641	15.077	80.2209	0.738372	0.802682	0.960284
Matured_DD_liver	DD_liver_3	0.471236	0.404021	3.0803	3.97601	2.9329	0.0571051	0.230579	0.107275
Matured_DD_liver	DD_liver_3	2.72449	1.26252	17.8733	9.88322	1.45807	0.283894	0.802412	0.373318
Matured_DD_liver	DD_liver_3	1.391	0.8625	10.4886	6.18914	4.3828	0.227561	0.803987	0.320615
Matured_DD_liver	DD_liver_3	0.156664	0.374172	1.10048	1.98276	1e-05	0.0569544	0.45994	1e-05
Matured_DD_liver	DD_liver_3	0.289866	0.47929	2.33558	2.67051	2.86531	1e-05	0.112632	1e-05
Matured_DD_liver	DD_liver_3	0.553979	0.429374	3.37457	3.94381	4.36373	0.141607	0.114356	0.15961
Matured_DD_liver	DD_liver_3	0.120576	0.170889	0.0907476	1.22627	2.89458	0.0845383	0.227565	1e-05
Matured_DD_liver	DD_liver_3	0.189906	0.228369	0.773104	1.96648	1e-05	1e-05	0.228081	0.0530568
Matured_DD_liver	DD_liver_3	0.902387	0.487797	4.25124	3.95333	1.45808	0.141948	0.573157	0.213327
Matured_DD_liver	DD_liver_3	0.414747	0.114296	1.86638	1.96841	1.45199	0.0848132	0.114153	0.212435
Matured_DD_liver	DD_liver_3	3.64361	1.62752	18.286	9.83473	5.80367	0.536752	0.228136	0.371486
Matured_DD_liver	DD_liver_3	4.12134	1.17394	19.8424	12.0812	10.1848	0.509923	0.228774	0.372525
Matured_DD_skin	DD_skin_1	0.182067	1.72417	2.74677	96.6218	36.158	0.21662	0.655999	0.254333
Matured_DD_skin	DD_skin_1	0.317614	4.09081	5.0199	235.394	67.4188	0.382864	0.883386	0.66786
Matured_DD_skin	DD_skin_1	0.366193	2.31189	3.11308	112.81	25.1741	0.326768	0.219903	0.0511544
Matured_DD_skin	DD_skin_1	0.483053	4.32412	6.05508	238.825	72.7769	0.463251	0.77021	0.5631
Matured_DD_skin	DD_skin_1	0.701769	4.4757	5.58974	236.712	40.7133	0.492025	1.32446	0.66755
Matured_DD_skin	DD_skin_1	0.634364	3.754	4.92511	182.307	42.0793	0.436963	0.77191	0.153912
Matured_DD_skin	DD_skin_1	0.284898	1.8843	2.56042	95.2064	25.3458	0.411246	0.996315	0.103007
Matured_DD_skin	DD_skin_1	0.166088	1.07103	1.31251	49.1875	19.537	0.0815135	0.548557	0.204171
Matured_DD_skin	DD_skin_1	0.100192	2.0156	2.19935	116.976	28.061	0.273181	0.330914	0.359231
Matured_DD_skin	DD_skin_1	0.517163	4.79972	5.44918	262.233	84.1027	0.545841	1.2122	0.307618
Matured_DD_skin	DD_skin_1	0.370016	3.47623	3.98734	204.747	62.1789	0.302664	1.22209	0.568572
Matured_DD_skin	DD_skin_1	0.267552	3.31795	4.88938	250.947	59.0106	0.711265	0.552296	0.462515
Matured_DD_skin	DD_skin_1	0.404194	4.20491	5.72284	234.755	67.9224	0.468379	0.778737	0.310545
Matured_DD_skin	DD_skin_1	0.481895	4.89075	6.30319	251.502	68.4138	0.543694	0.87813	0.714954
Matured_DD_skin	DD_skin_1	0.335219	2.71597	2.16341	128.391	36.6155	0.191941	0.996449	0.360572
Matured_DD_skin	DD_skin_1	0.199353	2.19752	3.28206	115.429	26.5209	0.217422	0.548689	0.20422
Matured_DD_skin	DD_skin_1	0.26624	2.20112	3.63811	152.341	46.1382	0.326667	1.09918	0.409109
Matured_DD_skin	DD_skin_1	0.167591	3.76869	5.12097	276.797	91.5287	0.548341	1.77127	0.618055
Matured_DD_skin	DD_skin_1	0.151834	3.71006	4.93281	265.906	99.2245	0.38639	1.00296	0.362929
Matured_DD_skin	DD_skin_1	0.200144	2.92327	3.8223	173.118	43.4427	0.24557	0.991559	0.461317
Matured_DD_skin	DD_skin_1	0.351086	4.64414	6.82606	369.436	110.972	0.519659	1.21479	0.462416
Matured_DD_skin	DD_skin_1	0.283996	4.47487	6.07277	312.069	80.0077	0.437275	1.98633	0.616085
Matured_DD_skin	DD_skin_1	0.50236	3.79328	5.02854	236.753	68.9419	0.493102	1.10613	0.411699
Matured_DD_skin	DD_skin_1	0.248494	1.91744	2.92376	100.246	33.4063	0.243914	0.656583	0.458207
Matured_DD_skin	DD_skin_1	0.281887	3.39977	3.40694	156.528	54.3356	0.542534	0.547659	0.203836
Matured_DD_skin	DD_skin_1	0.265393	3.48317	3.84499	195.548	55.7472	0.217085	0.876544	0.25488
Matured_DD_skin	DD_skin_1	0.3366	3.4507	4.52198	227.886	67.8764	0.275331	1.66759	0.465503
Matured_DD_skin	DD_skin_1	0.282021	3.70312	4.23885	171.011	71.0879	0.244256	0.986255	0.509833
Matured_DD_skin	DD_skin_1	0.46891	6.25807	10.1903	452.803	146.338	0.684923	1.54872	1.2352
Matured_DD_skin	DD_skin_1	0.416918	4.96345	6.94082	354.268	82.6714	0.873033	1.76256	0.666268
Matured_DD_skin	DD_skin_1	0.384655	3.67787	6.43191	211.213	73.0702	0.711357	1.54663	0.71956
Matured_DD_skin	DD_skin_1	0.300445	3.20148	4.57266	187.984	58.9026	0.382288	1.21283	0.564261
Matured_DD_skin	DD_skin_1	0.313107	2.88832	4.2107	209.06	49.8465	0.377431	0.653138	0.303869
Matured_DD_skin	DD_skin_1	0.367317	5.46619	5.6735	273.857	74.3511	0.355085	1.54405	0.461802
Matured_DD_skin	DD_skin_1	0.233124	3.41414	4.47407	258.191	72.7538	0.57207	0.549975	0.460572
Matured_DD_skin	DD_skin_1	0.46924	5.84683	6.48929	424.011	95.75	0.849902	1.77121	0.87555
Matured_DD_skin	DD_skin_1	0.282536	3.16027	5.51619	235.215	78.1999	0.598161	0.878272	0.357535
Matured_DD_skin	DD_skin_1	0.365092	6.91483	7.99972	394.121	126.886	0.651571	1.64432	0.663008
Matured_DD_skin	DD_skin_1	0.451626	6.63785	5.77205	339.378	84.3256	0.903025	1.21541	0.565462
Matured_DD_skin	DD_skin_1	0.230074	2.47276	3.50645	168.471	56.613	0.32262	0.651336	0.353535
Matured_DD_skin	DD_skin_1	0.0827292	1.80565	3.05092	118.027	37.5358	0.351886	1.20225	0.101698
Matured_DD_skin	DD_skin_1	0.282613	3.49098	4.55428	231.491	75.4275	0.407948	1.09814	0.255451
Matured_DD_skin	DD_skin_1	0.199948	4.76632	5.61811	273.539	60.2002	0.599694	0.880523	0.614488
Matured_DD_skin	DD_skin_1	0.212952	2.87108	2.50271	156.733	55.0543	0.241186	0.649238	0.20137
Matured_DD_skin	DD_skin_1	0.501748	4.95015	5.77137	301.713	98.3684	0.68403	0.662872	0.308398
Matured_DD_skin	DD_skin_1	0.429146	5.92233	8.00006	342.408	69.3418	0.621055	1.52642	0.405805
Matured_DD_skin	DD_skin_1	0.451502	6.66367	7.44433	358.808	82.8974	0.793348	1.54646	1.02783
Matured_DD_skin	DD_skin_1	0.530879	6.11718	6.29291	317.23	96.1807	0.759931	1.31505	0.407879
Matured_DD_skin	DD_skin_2	0.187859	1.58135	10.9767	93.1303	30.1336	0.307328	0.112811	0.262425
Matured_DD_skin	DD_skin_2	0.120284	1.27856	5.79378	40.6135	11.5503	0.196778	0.227014	0.422468
Matured_DD_skin	DD_skin_2	0.102848	0.736921	2.16736	20.7453	7.20128	0.168255	0.22646	0.210718
Matured_DD_skin	DD_skin_2	0.0692991	1.14585	7.21054	73.0151	30.5689	0.11337	0.457764	0.372701
Matured_DD_skin	DD_skin_2	0.0855806	1.66978	9.19769	72.8668	25.8863	0.140006	0.904501	0.368213
Matured_DD_skin	DD_skin_2	0.343507	2.15834	12.2608	215.933	38.9639	0.309079	2.15563	0.422271
Matured_DD_skin	DD_skin_2	0.58562	2.16447	12.6586	480.178	59.3354	0.704445	7.28167	0.846939
Matured_DD_skin	DD_skin_2	0.450623	2.52187	30.5428	473.799	56.7934	0.708843	6.7547	0.532642
Matured_DD_skin	DD_skin_2	0.0512384	0.81898	3.41925	48.1496	11.4804	0.139706	0.902565	0.209957
Matured_DD_skin	DD_skin_2	0.0860463	0.853659	4.75987	109.282	15.9055	0.197075	0.454712	0.26444
Matured_DD_skin	DD_skin_2	0.0685832	0.595358	2.52924	20.0182	5.7625	0.0560994	0.226518	1e-05
Matured_DD_skin	DD_skin_2	0.136695	1.27138	9.40703	81.9872	12.9211	0.16772	1.01583	0.157536
Matured_DD_skin	DD_skin_2	0.347978	3.73995	24.3824	181.337	46.7805	0.370029	1.72396	0.58818
Matured_DD_skin	DD_skin_2	0.0521219	1.43638	12.0364	90.0437	39.4145	0.142115	0.688595	0.533942
Matured_DD_skin	DD_skin_2	0.0695664	0.690163	2.70293	19.3147	8.76766	0.0284518	0.344647	0.267242
Matured_DD_skin	DD_skin_2	0.137411	0.88043	5.24848	35.4612	7.21598	0.112399	0.340383	0.158361
Matured_DD_skin	DD_skin_2	0.155481	1.05691	7.91823	68.1347	11.6123	0.339146	0.798817	0.265461
Matured_DD_skin	DD_skin_2	0.714273	2.9382	20.7426	703.709	95.1452	0.883512	7.24996	1.49911
Matured_DD_skin	DD_skin_2	0.225081	1.31691	11.1739	162.702	34.914	0.169949	1.94428	0.319258
Matured_DD_skin	DD_skin_2	0.188688	0.82253	3.79556	49.8237	12.9714	0.0561246	0.566548	0.210867
Matured_DD_skin	DD_skin_2	0.1039	0.68719	5.20011	44.1337	13.0948	0.0566585	0.571938	0.212873
Matured_DD_skin	DD_skin_2	0.0518664	0.54315	2.86912	22.6468	4.35792	0.141418	0.34261	0.371928
Matured_DD_skin	DD_skin_2	0.138575	1.34616	7.25499	60.1782	24.7422	0.141689	0.114422	0.159703
Matured_DD_skin	DD_skin_2	0.440359	7.71816	53.6839	460.211	125.8	0.835671	2.32708	2.32772
Matured_DD_skin	DD_skin_2	0.315436	7.15709	55.8095	437.395	88.3452	0.802725	1.15758	1.50797
Matured_DD_skin	DD_skin_2	0.0516523	1.02488	7.07517	56.6284	23.1463	0.112668	0.341196	0.370392
Matured_DD_skin	DD_skin_2	0.0862263	1.31168	6.90489	53.0367	11.5919	0.310336	0.227832	0.211995
Matured_DD_skin	DD_skin_2	0.0864022	1.28578	10.5605	74.0584	37.7504	0.19789	0.228296	0.371748
Matured_DD_skin	DD_skin_2	0.18917	1.22273	13.1825	89.1281	27.4541	0.14067	0.454396	0.581364
Matured_DD_skin	DD_skin_2	0.226882	1.44287	8.50496	62.8682	19.0631	0.256963	0.691707	0.214542
Matured_DD_skin	DD_skin_2	0.138402	1.11562	3.82803	33.5	8.72161	0.141512	0.685674	0.106335
Matured_DD_skin	DD_skin_2	0.241905	1.68566	8.60246	79.7105	47.9098	0.141338	1e-05	0.212409
Matured_DD_skin	DD_skin_2	0.0522744	0.518611	2.52449	27.5388	10.2485	0.0285061	0.575509	0.107101
Matured_DD_skin	DD_skin_2	0.0342162	1.04666	5.45294	39.2176	7.18728	0.13994	0.11301	0.315463
Matured_DD_skin	DD_skin_2	0.278612	4.89474	33.0719	271.486	74.6179	0.769155	1.38031	0.96327
Matured_DD_skin	DD_skin_2	0.428013	4.38783	25.1649	182.58	73.3636	0.420125	1.3571	0.841846
Matured_DD_skin	DD_skin_2	0.103393	1.45316	7.3536	55.4502	23.1662	0.112764	0.22766	0.211835
Matured_DD_skin	DD_skin_2	0.154369	1.19115	6.64167	43.47	28.823	0.19642	0.2266	0.368986
Matured_DD_skin	DD_skin_2	0.0691934	0.657859	5.19461	32.2648	14.5344	0.0282992	1.14266	0.212647
Matured_DD_skin	DD_skin_2	0.0861918	0.484558	3.81433	31.9075	5.7936	0.0564022	0.683221	0.158932
Matured_DD_skin	DD_skin_2	0.155286	0.827348	5.54489	43.7283	13.0474	0.08468	0.34192	0.265128
Matured_DD_skin	DD_skin_2	0.102435	1.15739	6.11616	40.3513	18.648	1e-05	0.225549	0.314806
Matured_DD_skin	DD_skin_2	0.310215	2.90664	16.8426	153.364	49.2337	0.310137	0.796898	0.529646
Matured_DD_skin	DD_skin_2	0.292096	1.30688	8.01112	71.9245	47.6413	0.140545	1.36198	0.422437
Matured_DD_skin	DD_skin_2	0.102939	1.07799	6.50781	47.8782	8.64915	0.168403	0.566648	0.369082
Matured_DD_skin	DD_skin_2	0.258304	2.30635	14.9238	128.967	30.3845	0.366229	0.455002	0.370452
Matured_DD_skin	DD_skin_2	0.13849	3.40625	21.7516	175.001	47.9994	0.424806	1.02917	0.638419
Matured_DD_skin	DD_skin_2	0.120484	1.25223	7.88901	66.4129	18.8004	0.253421	0.79587	0.528963
Matured_DD_skin	DD_skin_2	0.187716	0.790073	6.8777	58.071	14.3384	0.279176	0.112726	0.262225
Matured_DD_skin	DD_skin_2	0.085658	0.849806	7.03989	43.906	18.7126	0.112106	0.565825	0.210598
Matured_DD_skin	DD_skin_2	0.137167	0.850515	5.78114	50.2898	12.9657	0.112199	0.566297	0.105387
Matured_DD_skin	DD_skin_2	0.0684594	0.735779	4.46326	47.031	20.1324	0.139995	0.565272	0.210392
Matured_DD_skin	DD_skin_2	0.120503	1.96404	10.5657	112.994	31.8211	0.0563248	0.56857	0.423238
Matured_DD_skin	DD_skin_2	0.0861576	0.455874	2.99579	23.5531	11.5826	0.0563799	0.341475	0.105913
Matured_DD_skin	DD_skin_2	0.171931	0.710712	4.7101	40.3915	7.22297	0.196889	0.681426	0.317029
Matured_DD_skin	DD_skin_2	0.0345963	0.829467	3.46304	34.2348	17.4411	0.113196	0.685592	0.159484
Matured_DD_skin	DD_skin_2	0.0856335	0.877883	4.91749	39.5041	21.5853	0.112074	0.565663	0.157903
Matured_DD_skin	DD_skin_2	0.0688715	1.33807	7.34748	63.9843	18.8069	0.11267	0.341205	0.264573
Matured_DD_skin	DD_skin_2	0.103554	1.42688	9.31996	69.7892	21.7521	0.141175	0.570034	0.583451
Matured_DD_skin	DD_skin_2	0.085989	0.682472	4.25838	30.1183	13.0049	0.0281348	1e-05	0.211411
Matured_DD_skin	DD_skin_2	0.0863594	0.99956	6.59707	63.4472	17.4146	0.14128	0.228183	0.424644
Matured_DD_skin	DD_skin_2	0.10288	2.06968	11.7435	100.34	21.6104	0.112204	0.906115	0.421565
Matured_DD_skin	DD_skin_2	0.172823	1.37165	7.64812	71.6058	27.5898	0.197911	0.228321	0.478013
Matured_DD_skin	DD_skin_2	0.102907	0.850779	6.23473	51.0381	14.4108	0.112234	0.679767	0.316258
Matured_DD_skin	DD_skin_2	0.0855731	1.10365	7.61899	53.366	18.6941	0.447979	0.565264	0.262986
Matured_DD_skin	DD_skin_2	0.104528	1.84359	11.6104	113.358	26.348	0.171003	0.575395	0.321239
Matured_DD_skin	DD_skin_2	0.0173514	0.77464	2.92522	26.4346	5.83161	0.0567722	0.114617	0.2133
Matured_DD_skin	DD_skin_2	0.0868245	0.401977	1.28078	12.1149	1.45903	1e-05	0.114706	0.213465
Matured_DD_skin	DD_skin_2	0.260019	1.17516	7.48861	56.5201	20.3908	0.170151	0.458024	0.213093
Matured_DD_skin	DD_skin_2	0.138224	1.74271	8.92058	100.371	23.2277	0.169596	0.228264	0.265497
Matured_DD_skin	DD_skin_2	0.0518475	0.771562	4.68907	23.3767	7.26055	0.113093	0.456647	0.265565
Matured_DD_skin	DD_skin_2	0.121129	1.20171	5.10517	46.3191	11.6314	0.0566173	0.228609	0.212718
Matured_DD_skin	DD_skin_2	0.172574	1.39821	10.3646	97.7936	44.9499	0.197625	0.455983	0.477323
Matured_DD_skin	DD_skin_2	0.171961	2.87179	7.79115	69.7795	20.2279	0.0843959	0.454364	0.317085
Matured_DD_skin	DD_skin_2	0.120758	1.6259	10.0428	88.6706	27.5401	0.282221	0.569775	0.265085
Matured_DD_skin	DD_skin_2	0.0862481	2.08211	13.9496	127.222	42.0311	0.366854	1.48128	0.318073
Matured_DD_skin	DD_skin_2	0.120834	1.08462	5.86577	57.2666	11.6031	0.0564797	1e-05	0.318301
Matured_DD_skin	DD_skin_2	0.0684325	0.452609	0.721051	10.9615	10.0622	0.0839642	0.33903	0.157732
Matured_DD_skin	DD_skin_2	0.0342687	0.169988	0.451347	4.87922	1.43966	0.0560618	0.113183	0.105316
Matured_DD_skin	DD_skin_2	0.0514503	0.56715	1.17458	11.2325	4.32296	0.0280568	0.226575	0.210825
Matured_DD_skin	DD_skin_2	0.0520663	0.487849	3.10876	29.9002	5.83295	0.0283926	0.229287	0.160012
Matured_DD_skin	DD_skin_2	0.0685825	0.595351	2.16789	13.6708	7.20305	0.140247	0.339773	0.105385
Matured_DD_skin	DD_skin_2	0.034371	0.681985	4.07426	35.48	11.5517	0.196803	0.113521	0.21126
Matured_DD_skin	DD_skin_2	0.0688967	1.48096	8.34833	73.8173	23.1554	0.338135	0.910212	0.370537
Matured_DD_skin	DD_skin_2	0.120894	1.11371	8.64381	75.2459	18.8645	0.169524	0.684501	0.424613
Matured_DD_skin	DD_skin_2	0.156423	2.47149	15.383	117.298	56.953	0.454935	0.918466	0.534139
Matured_DD_skin	DD_skin_2	0.20844	4.42304	22.7862	203.541	46.7027	0.426247	1.60636	0.587202
Matured_DD_skin	DD_skin_2	0.189681	0.997932	6.22295	42.2293	15.9374	0.0564199	0.341718	0.317965
Matured_DD_skin	DD_skin_2	0.0170879	0.226037	0.18005	3.89281	4.30729	0.027955	1e-05	0.0525152
Matured_DD_skin	DD_skin_2	0.0689323	0.113979	0.181579	1.96294	1e-05	0.056385	0.113835	0.0529613
Matured_DD_skin	DD_skin_2	0.0513442	0.254691	0.901662	6.33574	2.87603	0.0279989	0.226107	0.0525976
Matured_DD_skin	DD_skin_2	0.0690831	0.028557	0.545929	1.96723	1e-05	0.0282541	0.228169	0.159231
Matured_DD_skin	DD_skin_2	0.0512372	0.25416	0.179956	2.67491	1e-05	0.111762	0.56409	0.157464
Matured_DD_skin	DD_skin_2	0.0342326	0.198111	0.450871	4.87408	1.43814	0.0560028	0.452255	0.105205
Matured_DD_skin	DD_skin_2	0.154807	0.796356	6.29806	60.737	8.67147	0.196978	0.795354	0.26431
Matured_DD_skin	DD_skin_2	0.103689	0.942967	6.46418	49.9495	33.3966	0.141359	0.570776	0.477991
Matured_DD_skin	DD_skin_2	0.138211	2.14247	16.3832	138.243	43.5479	0.282633	1.71182	0.530943
Matured_DD_skin	DD_skin_2	0.241759	2.54124	15.1476	116.051	46.43	0.960516	1.4829	0.636843
Matured_DD_skin	DD_skin_2	0.325763	1.33244	6.95524	55.9032	20.1683	0.448785	0.453025	0.368843
Matured_DD_skin	DD_skin_3	0.465684	1.70501	4.38103	16.3394	11.1793	1.22438	0.439448	0.511127
Matured_DD_skin	DD_skin_3	0.883037	4.49047	10.9281	54.0868	29.3979	2.6439	0.220114	0.921661
Matured_DD_skin	DD_skin_3	0.199405	2.06071	6.95976	14.1958	6.98099	0.761171	0.54883	0.561749
Matured_DD_skin	DD_skin_3	0.0995532	1.15227	3.80248	2.8349	8.36466	0.488593	0.438408	0.254958
Matured_DD_skin	DD_skin_3	0.0837066	1.16263	3.26336	4.29058	16.8797	0.54776	0.221174	0.1029
Matured_DD_skin	DD_skin_3	0.0998138	1.48537	3.94389	14.6853	6.9888	0.353796	0.549444	0.204501
Matured_DD_skin	DD_skin_3	0.299586	3.99041	8.15465	59.4807	11.1875	0.816846	0.989476	1.023
Matured_DD_skin	DD_skin_3	0.217686	1.3567	8.02791	3.8147	5.62783	1.04098	0.331836	0.566077
Matured_DD_skin	DD_skin_3	0.150241	1.18691	4.26543	7.6059	1e-05	0.382336	0.330813	0.205212
Matured_DD_skin	DD_skin_3	0.0834611	0.552007	4.30907	1.66366	4.20754	0.245769	0.330788	0.205196
Matured_DD_skin	DD_skin_3	0.38669	3.44713	78.6099	5.98451	16.9516	3.5481	2.33222	1.39506
Matured_DD_skin	DD_skin_3	0.599875	4.21552	70.1421	5.69407	15.4008	3.0804	1.98128	0.921778
Matured_DD_skin	DD_skin_3	0.0996189	1.18048	11.7211	3.30957	5.58012	0.787696	0.109674	0.408203
Matured_DD_skin	DD_skin_3	0.150484	1.16118	5.19726	3.09489	1.40489	0.62914	0.662696	0.154158
Matured_DD_skin	DD_skin_3	0.217069	1.21481	6.94953	4.51712	9.82078	0.600963	1.21328	0.35921
Matured_DD_skin	DD_skin_3	0.214949	1.14826	3.44082	3.53131	6.94632	0.432795	0.218442	0.0508144
Matured_DD_skin	DD_skin_3	0.117174	1.24551	4.10073	5.00504	8.43877	0.492922	0.331719	0.257217
Matured_DD_skin	DD_skin_3	0.630675	3.07355	10.5799	5.90766	4.18347	4.12701	0.767422	0.561061
Matured_DD_skin	DD_skin_3	0.416102	2.50439	9.16325	4.97659	8.39081	3.2947	0.769612	0.409209
Matured_DD_skin	DD_skin_3	0.0831438	0.962341	5.03734	1.65734	2.79436	0.544077	0.549217	0.25552
Matured_DD_skin	DD_skin_3	0.184329	0.498741	3.84029	3.34028	8.44784	0.520865	0.332076	0.308993
Matured_DD_skin	DD_skin_3	0.1826	0.686199	4.37273	4.96343	12.5529	0.488823	0.548268	0.255079
Matured_DD_skin	DD_skin_3	0.315488	1.45514	4.85507	6.85615	15.3467	0.842095	0.438736	0.357209
Matured_DD_skin	DD_skin_3	0.315524	1.51023	2.7559	4.72892	6.97657	1.57571	0.65818	0.153107
Matured_DD_skin	DD_skin_3	0.21731	1.32672	6.47288	6.9022	4.21358	1.01183	0.772945	0.205491
Matured_DD_skin	DD_skin_3	0.368994	2.7733	10.7803	8.59711	16.9111	1.20731	0.553963	0.876276
Matured_DD_skin	DD_skin_3	0.233304	1.1573	4.43363	5.22	2.80038	1.41765	0.33024	0.102428
Matured_DD_skin	DD_skin_3	0.334106	2.59647	31.8153	4.28134	7.01806	2.95153	1.54488	0.770088
Matured_DD_skin	DD_skin_3	0.569664	3.79543	23.1267	6.91816	9.85441	4.6323	0.885408	0.617897
Matured_DD_skin	DD_skin_3	0.297973	1.86129	4.9275	12.9634	11.1272	1.35408	0.6561	0.101749
Matured_DD_skin	DD_skin_3	0.401244	5.74992	14.1807	53.7971	11.2378	0.738468	1.32523	0.976217
Matured_DD_skin	DD_skin_3	0.315932	5.36137	10.7312	46.4033	11.1769	0.897686	0.878707	0.715424
Matured_DD_skin	DD_skin_3	0.497387	2.00123	6.15795	24.7866	15.3235	1.11206	1.42374	0.203812
Matured_DD_skin	DD_skin_3	0.315118	1.06951	3.23292	3.06984	4.18056	0.65118	0.876443	0.20388
Matured_DD_skin	DD_skin_3	0.402859	1.80408	6.27876	19.5979	9.87263	0.851283	0.554404	0.30952
Matured_DD_skin	DD_skin_3	0.214216	1.38957	8.24718	3.98851	1.38453	1.29396	0.653091	0.151923
Matured_DD_skin	DD_skin_3	0.315973	2.03484	9.28701	10.1817	11.1784	2.47576	0.988674	0.664409
Matured_DD_skin	DD_skin_3	0.166096	0.906302	4.85651	3.78383	6.97784	0.951035	0.219433	0.20418
Matured_DD_skin	DD_skin_3	0.466346	5.28752	16.2767	62.6048	13.994	1.25337	0.550091	0.460668
Matured_DD_skin	DD_skin_3	0.397346	0.903384	3.44531	4.71455	1e-05	0.975058	0.874906	0.152642
Matured_DD_skin	DD_skin_3	0.151253	0.889224	6.24199	2.15356	2.82412	0.714832	1.22114	0.30989
Matured_DD_skin	DD_skin_3	0.837735	4.29407	15.3589	11.9278	2.81553	4.00184	0.996078	0.46342
Matured_DD_skin	DD_skin_3	0.829136	3.15322	22.8892	7.79153	4.17994	4.20492	0.328618	0.458663
Matured_DD_skin	DD_skin_3	0.331529	0.931905	4.06086	2.5962	5.57115	0.515247	0.109498	0.15283
Matured_DD_skin	DD_skin_3	0.314959	1.01415	3.53694	1.88818	5.57125	0.352544	0.7665	0.101888
Matured_DD_skin	DD_skin_3	1.28045	1.18234	5.43171	3.31476	2.79444	0.89775	0.439385	0.306632
Matured_DD_skin	DD_skin_3	0.401258	2.54332	58.9707	4.52292	14.0477	2.73516	1.43572	0.822106
Matured_DD_skin	DD_skin_3	0.382356	1.45686	21.8517	3.78716	1.3968	1.4686	0.878506	0.25545
Matured_DD_skin	DD_skin_3	0.217383	1.46541	10.087	2.14278	5.61998	0.765967	0.552288	0.256949
Matured_DD_skin	DD_skin_3	0.165412	1.28548	4.00865	3.76825	1e-05	0.865938	0.655589	0.254174
Matured_DD_skin	DD_skin_3	0.166205	0.742008	6.56717	5.20619	4.18946	0.598187	0.658733	0.153236
Matured_DD_skin	DD_skin_3	1.36698	5.62314	22.5273	14.7161	9.8048	4.47262	1.65178	0.717251
Matured_DD_skin	DD_skin_3	1.10239	5.98528	22.5376	13.3533	8.29478	5.1412	0.652118	0.252829
Matured_DD_skin	DD_skin_3	0.279664	1.16965	2.77339	5.85574	4.1467	0.672819	0.760677	0.202229
Matured_DD_skin	DD_skin_3	0.348951	1.73096	8.6667	16.0882	5.58468	1.46794	0.768347	0.306402
Matured_DD_skin	DD_skin_3	0.27894	4.04249	10.114	40.884	17.9225	0.858979	0.758708	0.403411
Matured_DD_skin	DD_skin_3	0.213048	0.975522	4.5328	8.16686	11.0158	0.187673	0.974295	0.151095
Matured_DD_skin	DD_skin_3	0.115493	0.927553	6.69303	3.28882	6.93142	1.21462	0.544933	0.557759
Matured_DD_skin	DD_skin_3	0.182024	1.61431	19.1356	1.88486	8.34218	1.27234	0.655844	0.101709
Matured_DD_skin	DD_skin_3	0.181088	0.925501	2.60191	4.68792	5.53287	0.242387	0.326236	0.0505932
Matured_DD_skin	DD_skin_3	0.231581	0.765833	6.10023	1.88416	13.8985	0.838894	0.327801	0.406687
Matured_DD_skin	DD_skin_3	0.379923	1.20177	2.87181	3.29267	6.93954	1.27009	0.872915	0.253824
Matured_DD_skin	DD_skin_3	1.26629	2.36571	7.2777	6.5562	4.1453	3.79342	0.434526	0.303241
Matured_DD_skin	DD_skin_3	0.610562	3.21967	9.82381	5.87383	4.15951	3.77943	0.54502	0.507135
Matured_DD_skin	DD_skin_3	0.31408	0.874657	3.52708	4.70728	4.16679	0.297475	0.545973	0.203209
Matured_DD_skin	DD_skin_3	0.18237	1.12394	13.0143	4.48504	12.537	1.00353	0.547575	0.254756
Matured_DD_skin	DD_skin_3	0.511776	2.26567	46.7487	4.23101	13.8711	2.53873	0.981464	0.608828
Matured_DD_skin	DD_skin_3	0.363652	2.40517	12.5836	10.3554	6.94426	1.75771	0.76432	0.711191
Matured_DD_skin	DD_skin_3	0.148521	1.09146	6.30315	3.99437	11.0925	0.701923	0.545042	0.304293
Matured_DD_skin	DD_skin_3	0.180271	1.51748	3.28088	13.3003	5.5079	0.563019	0.757784	0.40292
Matured_DD_skin	DD_skin_3	0.316116	0.742776	3.15551	4.7378	6.98966	0.299403	0.769317	0.255657
Matured_DD_skin	DD_skin_3	0.19851	0.683822	1.39443	3.53303	11.1195	0.460067	0.218548	0.0508391
Matured_DD_skin	DD_skin_3	0.475163	1.57135	5.0498	7.23202	4.13009	1.95676	0.649397	0.201419
Matured_DD_skin	DD_skin_3	0.639053	3.11581	9.3233	3.49959	4.13035	3.94058	0.649438	0.402863
Matured_DD_skin	DD_skin_3	0.282454	1.75825	6.74005	11.8283	5.58408	1.52215	0.109752	0.204246
Matured_DD_skin	DD_skin_3	0.510682	0.898885	4.03567	9.1476	9.68903	0.808501	1e-05	0.405018
Matured_DD_skin	DD_skin_3	0.296074	1.76784	7.40914	5.62073	8.29226	0.511272	0.869225	0.252751
Matured_DD_skin	DD_skin_3	0.463357	4.98001	23.0163	20.2633	8.34261	4.30452	0.983817	0.406858
Matured_DD_skin	DD_skin_3	0.691116	7.07948	149.371	8.64018	24.0774	6.50802	4.11986	2.27937
Matured_DD_skin	DD_skin_3	0.441674	0.946689	3.49033	8.38483	24.7402	0.481705	0.972512	0.201092
Matured_DD_skin	DD_skin_3	0.314944	0.383715	2.61984	2.83214	6.96375	0.162705	0.547475	0.152826
Matured_DD_skin	DD_skin_3	0.131742	0.544584	1.34474	1.87576	8.30191	0.511868	0.326339	0.101218
Matured_DD_skin	DD_skin_3	0.295551	1.00453	16.7816	2.10405	5.51839	0.940151	0.759227	0.454148
Matured_DD_skin	DD_skin_3	0.263319	0.517032	5.63572	1.64027	13.8279	0.323083	0.217424	0.151733
Matured_DD_skin	DD_skin_3	0.132774	0.933046	3.14774	4.72614	6.97246	0.271515	0.986688	0.255028
Matured_DD_skin	DD_skin_3	0.24768	0.955585	3.13167	6.34771	5.54949	0.594283	0.545362	0.152236
Matured_DD_skin	DD_skin_3	0.299753	0.688387	2.85134	1.65975	5.59686	0.299678	0.66002	0.255892
Matured_DD_skin	DD_skin_3	0.148411	1.66323	6.34189	11.5046	5.54211	0.97117	0.435709	0.253389
Matured_DD_skin	DD_skin_3	0.197464	1.57811	4.68138	4.68587	1.38261	0.861445	0.217396	0.45514
Matured_DD_skin	DD_skin_3	0.378111	2.14743	4.59029	11.4694	11.0503	1.53298	0.434375	0.202091
Untreated_liver	Untreated_liver	37.8958	4.05838	109.361	7.6833	74.5926	0.968237	2.06976	1.6049
Untreated_liver	Untreated_liver	32.379	3.71199	106.717	5.65514	84.1556	0.706273	2.50957	1.96363
Untreated_liver	Untreated_liver	37.4983	3.96204	278.808	9.92959	91.6508	1.98927	5.19733	5.44056
Untreated_liver	Untreated_liver	40.9317	4.6205	130.413	7.50698	72.3569	1.0063	3.1345	2.53854
Untreated_liver	Untreated_liver	49.731	6.00322	180.031	16.3907	123.51	1.12996	3.74364	3.59227
Untreated_liver	Untreated_liver	44.0481	6.02617	132.383	8.9382	96.701	1.31227	2.76452	1.98286
Untreated_liver	Untreated_liver	27.5637	3.19378	51.8427	5.203	58.4837	0.284677	1.26441	0.855652
Untreated_liver	Untreated_liver	39.3114	4.23235	72.528	5.17121	77.0173	0.622461	1.25668	1.22248
Untreated_liver	Untreated_liver	26.6518	3.86617	163.334	7.50935	84.1969	0.977861	3.13549	2.97157
Untreated_liver	Untreated_liver	41.7583	4.51382	86.3842	6.01833	60.672	0.835564	2.79214	1.89441
Untreated_liver	Untreated_liver	12.6542	1.66374	31.5364	1.94256	20.061	0.167399	1.68981	0.419292
Untreated_liver	Untreated_liver	51.4432	6.65692	264.657	12.2288	111.254	2.16617	5.55523	5.11409
Untreated_liver	Untreated_liver	32.9543	4.35339	126.582	15.1437	77.6459	0.79869	2.87941	2.25058
Untreated_liver	Untreated_liver	37.6723	4.51681	176.836	10.931	100.51	1.08072	4.12783	2.24967
Untreated_liver	Untreated_liver	49.3509	6.3574	155.064	10.9987	122.435	1.09141	2.66733	3.12937
Untreated_liver	Untreated_liver	28.0055	7.64584	738.791	36.3703	167.629	4.81948	12.1933	19.3107
Untreated_liver	Untreated_liver	26.9546	6.31834	772.99	32.8043	94.4314	4.90301	13.7344	17.7879
Untreated_liver	Untreated_liver	49.2915	5.50931	190.909	7.78126	90.3561	1.29783	3.49358	3.90088
Untreated_liver	Untreated_liver	39.2239	4.53156	73.1579	6.71065	83.6018	0.571147	1.15309	1.07293
Untreated_liver	Untreated_liver	38.0064	4.37901	70.2701	6.24297	85.471	0.573849	1.85367	1.56312
Untreated_liver	Untreated_liver	28.3908	3.59767	122.394	26.9821	78.1389	0.889878	2.54997	2.15702
Untreated_liver	Untreated_liver	34.9585	4.11648	60.4891	7.68429	70.2139	0.626588	1.61002	0.963068
Untreated_liver	Untreated_liver	44.1777	5.84496	215.524	18.4631	101.492	1.42395	4.10686	3.7668
Untreated_liver	Untreated_liver	14.0736	6.50474	570.532	50.7528	131.905	3.53513	9.15008	11.6926
Untreated_liver	Untreated_liver	12.9234	1.69684	79.4016	3.46712	45.3046	0.17073	0.804266	1.06909
Untreated_liver	Untreated_liver	27.1644	3.25771	71.969	6.95095	87.8977	0.541947	1.61241	1.39316
Untreated_liver	Untreated_liver	43.2922	7.44271	396.485	24.2287	139.904	2.42466	7.49377	7.8726
Untreated_liver	Untreated_liver	44.5797	7.24746	282.359	19.5341	101.801	1.51574	4.82556	4.6544
Untreated_liver	Untreated_liver	18.9278	1.88811	42.567	4.43413	29.074	0.452869	1.82859	0.3722
Untreated_liver	Untreated_liver	19.3937	2.05048	38.9725	6.13077	50.6504	0.281768	1.59281	1.00571
Untreated_liver	Untreated_liver	21.8032	2.45869	42.6764	4.67748	53.7526	0.22629	2.17006	0.531374
Untreated_liver	Untreated_liver	18.8286	2.26891	47.6304	5.93546	53.9989	0.369406	1.26211	0.693951
Untreated_liver	Untreated_liver	6.09475	1.00776	16.284	2.23143	29.2625	0.113951	0.805193	0.214064
Untreated_liver	Untreated_liver	24.4802	4.91515	895.676	25.1732	128.963	6.64295	16.4274	24.3016
Untreated_liver	Untreated_liver	32.8597	5.00321	288.993	18.8959	111.508	1.65005	5.49369	5.71001
Untreated_liver	Untreated_liver	42.9268	5.86335	203.294	16.2377	101.811	1.34097	4.59061	3.50483
Untreated_liver	Untreated_liver	12.4637	2.99392	221.069	17.7711	82.7148	1.03532	4.06429	2.70127
Untreated_liver	Untreated_liver	24.1559	2.98547	71.6654	6.48935	57.4423	0.458844	1.50533	0.700347
Untreated_liver	Untreated_liver	42.4674	4.4796	103.942	6.26197	101.991	1.09363	2.32414	1.94633
Untreated_liver	Untreated_liver	55.7355	5.9732	108.987	5.82762	70.275	1.13539	1.76326	2.24228
Untreated_liver	Untreated_liver	48.4978	5.88872	90.502	11.4341	73.342	0.999604	2.19108	1.82416
Untreated_liver	Untreated_liver	73.3469	7.59632	125.625	8.30226	97.9864	1.79222	2.21767	2.44364
Untreated_liver	Untreated_liver	48.2282	5.53543	85.6127	5.95818	74.7158	0.99836	3.34011	1.4468
Untreated_liver	Untreated_liver	34.7311	3.47519	82.7679	4.23934	48.5627	0.716319	1.38833	1.72243
Untreated_liver	Untreated_liver	11.9681	2.59731	695.491	13.3127	128.84	3.57932	10.8703	15.5743
Untreated_liver	Untreated_liver	23.61	3.82794	522.177	26.9454	142.028	3.21623	9.22404	9.88159
Untreated_liver	Untreated_liver	39.231	6.97967	468.571	28.7328	132.224	2.81678	8.07155	8.93293
Untreated_liver	Untreated_liver	21.7397	6.06758	1079.22	34.4553	156.662	9.18331	18.7367	31.3329
Untreated_liver	Untreated_liver	18.7059	2.77887	403.387	10.1437	72.139	2.06205	6.03342	8.81403
Untreated_liver	Untreated_liver	60.7034	6.91612	152.84	12.7253	97.623	1.69607	3.66034	2.5819
Untreated_liver	Untreated_liver	57.3239	6.57038	155.225	12.9392	80.8484	1.63246	3.41348	2.79287
Untreated_liver	Untreated_liver	65.6316	7.64893	134.974	10.5989	110.201	1.15982	3.16109	2.77795
Untreated_liver	Untreated_liver	70.5094	6.62726	133.938	10.2363	110.241	1.44077	2.73068	2.37516
Untreated_liver	Untreated_liver	60.2553	6.57888	135.165	11.9936	106.918	1.11417	1.89423	2.31336
Untreated_liver	Untreated_liver	48.7109	5.26366	116.414	7.84962	77.7016	1.4547	2.58446	2.02223
Untreated_liver	Untreated_liver	6.42124	1.55086	339.29	8.47493	77.2916	1.4754	5.95735	5.21066
Untreated_liver	Untreated_liver	19.8714	3.05717	290.331	11.5013	105.578	1.52706	4.62445	4.57883
Untreated_liver	Untreated_liver	51.3713	9.7094	540.347	34.8808	199.553	3.48768	9.63542	11.5519
Untreated_liver	Untreated_liver	40.2983	7.8356	362.627	32.9575	136.295	2.17666	7.10336	5.93744
Untreated_liver	Untreated_liver	35.664	4.69146	335.43	17.8979	64.8802	1.9977	5.69385	6.12588
Untreated_liver	Untreated_liver	63.87	7.85269	279.456	13.1125	127.448	2.48148	6.32196	6.1045
Untreated_liver	Untreated_liver	48.7748	7.05942	456.427	18.1576	105.599	3.38645	7.6915	9.31527
Untreated_liver	Untreated_liver	54.3452	6.81069	404.656	29.4525	121.968	2.90911	7.91083	7.08212
Untreated_liver	Untreated_liver	81.3879	8.55915	166.21	12.6717	122.087	2.10967	5.03905	2.9584
Untreated_liver	Untreated_liver	33.4033	3.23864	76.9737	5.52732	25.2047	0.548482	1.39873	1.35573
Untreated_liver	Untreated_liver	22.7348	2.90306	292.877	10.2033	115.908	1.37752	5.2071	5.34068
Untreated_liver	Untreated_liver	3.4266	0.737739	248.597	5.08212	67.4788	0.905094	2.59357	3.3457
Untreated_liver	Untreated_liver	8.82563	1.26258	210.45	5.81528	52.2216	1.04583	4.22285	3.21986
Untreated_liver	Untreated_liver	39.6819	5.09765	213.047	19.5092	154.513	1.29776	3.5728	4.15556
Untreated_liver	Untreated_liver	31.1658	5.7426	428.151	34.094	145.905	2.27268	9.1766	8.70725
Untreated_liver	Untreated_liver	22.3742	3.1176	297.384	7.67017	57.3333	1.73322	4.74465	5.18745
Untreated_liver	Untreated_liver	25.061	3.20773	174.073	7.03097	72.6095	1.12522	2.21346	3.0894
Untreated_liver	Untreated_liver	22.4976	3.31063	372.595	8.034	99.4084	2.1142	6.73316	7.04827
Untreated_liver	Untreated_liver	56.192	6.7826	237.104	12.4971	103.849	2.0806	4.14135	4.18378
Untreated_liver	Untreated_liver	49.459	6.11774	280.107	12.3952	94.4811	1.60223	6.34966	4.45908
Untreated_liver	Untreated_liver	34.4782	3.49571	195.472	7.52537	62.1721	0.893481	3.14218	2.32818
Untreated_liver	Untreated_liver	27.7929	3.9987	337.437	6.42401	80.3678	1.9191	6.91441	5.99008
Untreated_liver	Untreated_liver	10.4382	1.55594	59.7658	3.4736	40.9967	0.45613	1.61154	1.33886
Untreated_liver	Untreated_liver	27.8318	4.09385	104.258	9.75057	69.3431	0.57453	2.20384	1.511
Untreated_liver	Untreated_liver	28.8497	6.98627	704.955	41.1038	234.53	4.50386	11.9975	15.9227
Untreated_liver	Untreated_liver	53.4831	6.52502	349.837	20.1962	103.902	2.26102	6.60691	6.59476
Untreated_liver	Untreated_liver	26.3318	3.93609	463.444	10.1681	98.4678	1.94717	7.25749	7.99107
Untreated_liver	Untreated_liver	47.5753	6.80199	486.902	17.8604	151.897	3.71198	7.67688	11.9054
Untreated_liver	Untreated_liver	39.9628	7.20851	735.262	18.3034	136.189	6.0653	12.6759	18.4938
Untreated_liver	Untreated_liver	25.8503	5.05008	736.725	14.932	142.223	5.20722	13.0043	18.2636
Untreated_liver	Untreated_liver	30.2196	5.15165	738.184	17.4177	109.209	4.94066	11.7423	21.0298
Untreated_liver	Untreated_liver	53.9459	5.3042	189.799	11.1648	76.3677	1.57438	2.70762	3.72435
Untreated_liver	Untreated_liver	19.6293	2.86743	462.252	11.295	108.506	2.35412	7.92121	7.2005
Untreated_liver	Untreated_liver	0.86231	0.285164	13.9468	0.736661	13.0415	0.0564279	0.797454	0.265008
Untreated_liver	Untreated_liver	6.98541	0.864112	122.289	4.71253	35.1279	0.512968	2.3014	1.39193
Untreated_liver	Untreated_liver	46.8385	7.24235	546.841	31.5799	192.623	4.14687	12.435	11.6279
Untreated_liver	Untreated_liver	61.4915	7.0121	342.544	20.821	110.582	2.87079	5.43358	6.23559
Untreated_liver	Untreated_liver	44.3016	5.7766	496.896	16.4043	90.5595	3.37448	8.59262	9.13752
Untreated_liver	Untreated_liver	73.7073	8.27835	264.812	13.8966	110.861	2.54292	6.32781	5.16585
Untreated_liver	Untreated_liver	47.6537	7.09863	580.24	12.491	128.603	3.72542	9.00083	15.0868
Untreated_liver	Untreated_liver	30.1662	5.12991	987.067	16.1136	154.11	6.63965	16.2404	27.6444
Untreated_liver	Untreated_liver	38.3207	5.67248	396.947	12.731	93.5269	2.62704	7.7145	7.6269
Untreated_liver	Untreated_liver	40.8065	5.42111	522.769	13.4505	71.5921	3.39393	9.91091	11.7837
Untreated_liver	Untreated_liver	15.1466	1.86503	229.535	4.33358	48.138	1.34733	4.8489	5.83238
Untreated_liver	Untreated_liver	10.9294	2.50177	295.307	15.7135	92.7282	1.31042	4.11537	4.10283
Untreated_liver	Untreated_liver	3.45017	0.864366	77.159	4.46582	14.6409	0.25656	1.38125	1.07103
Untreated_liver	Untreated_liver	9.18006	1.48302	128.506	5.50872	38.4186	0.345244	2.43954	1.51331
Untreated_liver	Untreated_liver	61.3924	7.14373	153.241	10.379	123.991	1.59975	2.81866	3.05986
Untreated_liver	Untreated_liver	40.3511	4.27806	94.2948	5.55097	52.1139	0.782757	1.75589	1.25261
Untreated_liver	Untreated_liver	71.346	7.92446	207.279	10.5575	103.33	1.95271	3.58392	3.77944
Untreated_liver	Untreated_liver	33.3025	5.04843	562.538	15.2957	120.35	3.32993	11.0801	13.6114
Untreated_liver	Untreated_liver	33.6244	5.074	681.715	18.9155	146.212	4.98958	12.36	17.1363
Untreated_liver	Untreated_liver	40.2014	6.99876	740.372	16.9073	157.706	5.79656	12.6515	20.8955
Untreated_liver	Untreated_liver	14.674	4.11351	993.837	17.7107	80.0186	7.34487	14.5076	30.0445
Untreated_liver	Untreated_liver	3.36426	0.782264	132.238	4.4907	8.8335	0.257989	2.19916	2.04629
Untreated_liver	Untreated_liver	5.52444	0.811963	123.163	5.74326	48.6278	0.545132	2.08528	2.91049
Untreated_liver	Untreated_liver	7.77235	3.20524	586.296	28.9145	124.095	3.11084	10.8536	11.1204
Untreated_liver	Untreated_liver	2.54173	0.724608	130.352	3.24458	25.0382	0.172061	2.08424	1.88549
Untreated_liver	Untreated_liver	15.604	1.71435	37.0523	2.70641	31.9421	0.254425	0.799024	0.584165
Untreated_liver	Untreated_liver	46.5109	5.92028	105.513	9.2918	88.9179	1.24075	2.91272	1.30092
Untreated_liver	Untreated_liver	70.4345	7.37066	248.734	11.6101	121.802	2.10474	3.95001	5.06766
Untreated_liver	Untreated_liver	79.9901	8.22543	171.918	14.8844	98.4363	2.29992	3.57178	3.87741
Untreated_liver	Untreated_liver	54.2064	5.88359	147.592	11.8467	72.8843	1.39013	2.92347	2.82907
Untreated_liver	Untreated_liver	26.5624	3.52119	721.586	19.7627	143.783	4.75919	13.0623	17.2965
Untreated_liver	Untreated_liver	3.09085	0.808468	166.102	2.98359	17.6067	0.399947	1.8456	2.6833
Untreated_liver	Untreated_liver	2.36216	0.260387	25.3042	1.49479	5.8807	0.0572501	0.57791	0.860382
Untreated_skin	Untreated_skin	0.280759	7.13756	1.06313	92.6917	14.7437	0.0861202	0.347736	0.161782
Untreated_skin	Untreated_skin	1.12958	32.3645	2.51058	546.323	166.092	0.635228	1.86539	1.03059
Untreated_skin	Untreated_skin	2.68682	83.1872	5.32002	1280.91	249.993	1.9765	5.00282	2.38295
Untreated_skin	Untreated_skin	3.62742	107.283	6.35446	1249.21	180.167	1.75397	5.42967	2.47121
Untreated_skin	Untreated_skin	2.58342	95.5107	6.90102	1242.6	197.192	1.33934	3.96584	3.29879
Untreated_skin	Untreated_skin	2.71274	87.6145	6.06454	1172.96	205.437	1.63502	4.00828	2.30361
Untreated_skin	Untreated_skin	1.11182	40.5028	1.72004	517.373	80.0721	0.433068	1.74864	0.813544
Untreated_skin	Untreated_skin	0.475694	20.6835	1.06742	331.124	78.4572	0.115291	1.28018	0.487306
Untreated_skin	Untreated_skin	1.27875	42.141	2.85381	631.176	147.734	0.697323	2.22905	1.2008
Untreated_skin	Untreated_skin	2.84619	77.0336	6.93504	1392.52	327.326	2.44452	5.87527	2.46009
Untreated_skin	Untreated_skin	2.83067	99.9594	6.4591	1315.12	198.451	2.03521	6.19308	2.3272
Untreated_skin	Untreated_skin	3.31636	104.992	7.59639	1265.67	236.244	1.85761	5.95289	3.37885
Untreated_skin	Untreated_skin	3.82253	94.5109	18.7675	1164.4	220.149	2.02577	7.58692	2.75764
Untreated_skin	Untreated_skin	3.46533	102.366	8.13503	1269.54	200.647	1.79179	5.2186	2.70382
Untreated_skin	Untreated_skin	1.46014	51.37	3.10482	539.531	50.2562	0.575596	2.20793	0.810969
Untreated_skin	Untreated_skin	0.208376	4.6801	0.411673	43.5143	5.83605	1e-05	0.229409	0.160097
Untreated_skin	Untreated_skin	1.86297	64.1849	4.38833	1122.48	273.929	1.40664	4.85144	2.53236
Untreated_skin	Untreated_skin	3.73813	113.237	9.08206	1806.52	385.745	3.82955	8.15099	4.01527
Untreated_skin	Untreated_skin	4.69572	115.525	7.29596	1446.86	241.966	2.46063	4.4831	3.26953
Untreated_skin	Untreated_skin	3.88601	127.528	7.29817	1376.83	219.185	2.38399	5.11013	2.65391
Untreated_skin	Untreated_skin	4.16687	115.989	6.87208	1364.3	231.376	2.31178	4.30823	2.95089
Untreated_skin	Untreated_skin	3.44083	104.038	6.89221	1189.56	188.22	1.3193	4.49842	2.36824
Untreated_skin	Untreated_skin	1.84429	59.4799	2.63729	572.701	73.7909	0.402289	2.08846	0.809704
Untreated_skin	Untreated_skin	0.156065	4.18616	0.182711	37.5283	7.28492	1e-05	0.114545	0.0532914
Untreated_skin	Untreated_skin	1.86602	83.157	6.10846	1446.31	417.083	2.28213	7.18032	1.61463
Untreated_skin	Untreated_skin	3.59087	110.634	7.08232	1552.83	315.357	2.92248	6.79415	3.60458
Untreated_skin	Untreated_skin	4.17429	128.779	8.68087	1503.32	244.589	2.69563	7.49814	3.20714
Untreated_skin	Untreated_skin	4.48275	125.349	10.1418	1446.89	212.625	2.51352	7.40284	3.27748
Untreated_skin	Untreated_skin	3.62669	128.944	7.82507	1451.81	264.909	2.53423	5.77847	3.08046
Untreated_skin	Untreated_skin	3.36468	115.247	7.67185	1165.73	142.874	1.86441	5.37722	1.61222
Untreated_skin	Untreated_skin	1.55682	57.3924	3.26209	554.154	53.5119	0.49201	1.16861	1.7398
Untreated_skin	Untreated_skin	0.259841	7.67629	0.456309	60.9208	4.36646	0.0283391	0.228855	0.31942
Untreated_skin	Untreated_skin	3.98399	99.0208	7.55034	1571.35	363.522	2.38881	5.59677	3.7119
Untreated_skin	Untreated_skin	4.40291	123.673	8.62662	1597.02	347.011	3.06572	8.05219	3.07527
Untreated_skin	Untreated_skin	4.07926	138.018	8.30982	1648.21	312.281	2.84735	8.7425	3.67738
Untreated_skin	Untreated_skin	4.96244	111.067	11.8964	1276.63	209.977	2.19019	6.24943	3.34638
Untreated_skin	Untreated_skin	3.08523	106.922	7.46551	1298.17	188.392	1.6433	4.73951	2.81141
Untreated_skin	Untreated_skin	2.55317	97.3889	4.63827	929.87	118.357	1.23866	2.67519	2.38101
Untreated_skin	Untreated_skin	0.9501	33.3904	1.22861	259.239	23.2231	0.141301	0.684655	0.849419
Untreated_skin	Untreated_skin	0.173063	2.40372	0.136763	28.337	8.72464	0.0283122	1e-05	0.0531862
Untreated_skin	Untreated_skin	1.90009	56.7002	4.76907	1163.82	323.818	1.67153	5.68361	2.09338
Untreated_skin	Untreated_skin	3.53282	116.133	9.54714	1804.05	392.191	3.41381	8.46402	4.21911
Untreated_skin	Untreated_skin	4.80432	135.852	10.4669	1659.45	277.712	2.80701	7.15839	3.21939
Untreated_skin	Untreated_skin	2.93261	111.855	6.35061	1401.74	232.799	2.26636	6.41764	3.75986
Untreated_skin	Untreated_skin	2.61112	92.8842	5.4648	1057.26	177.316	1.52141	4.25295	2.58325
Untreated_skin	Untreated_skin	1.64565	63.6671	3.72897	669.674	93.6675	0.578969	2.57153	1.35954
Untreated_skin	Untreated_skin	0.604598	13.4245	0.591542	122.976	13.0627	0.141299	1e-05	0.212351
Untreated_skin	Untreated_skin	0.30978	6.43118	0.952016	66.6505	8.67613	0.0281548	1.02315	0.0528904
Untreated_skin	Untreated_skin	0.155421	3.11239	0.318426	59.9942	14.5097	1e-05	0.228145	0.371501
Untreated_skin	Untreated_skin	1.09426	40.0391	5.39301	680.757	177.952	0.664091	5.24634	1.62722
Untreated_skin	Untreated_skin	2.24117	58.0374	4.88095	936.199	259.48	0.894961	3.38052	1.9524
Untreated_skin	Untreated_skin	1.98048	54.208	3.67979	863.071	193.148	0.954634	1.98571	1.57596
Untreated_skin	Untreated_skin	0.630625	25.3441	1.66117	356.413	72.1203	0.171945	0.578566	0.430679
Untreated_skin	Untreated_skin	0.261023	11.5668	0.595901	190.036	38.0149	0.0569361	0.689688	0.748705
Untreated_skin	Untreated_skin	0.226199	7.56664	0.687513	97.3626	26.3155	0.0853961	0.229874	0.267369
Untreated_skin	Untreated_skin	0.330312	5.80662	0.641125	88.615	36.5178	0.0568816	0.344514	0.213711

## Sheet: G48696
Rossi, V., Webb, S.M., and McNamara, M., 2021, Maturation experiments reveal bias in the chemistry of fossil melanosomes: Geology, v. 49, https://doi.org/10.1130/G48696.1
